1

2

3

4

5

6 **Cryo-ET reveals nucleosome reorganisation in condensed**

7 **mitotic chromosomes *in vivo***

8

9

10 Shujun Cai<sup>1</sup>, Chen Chen<sup>1</sup>, Zhi Yang Tan<sup>1</sup>, Yinyi Huang<sup>2,†</sup>, Jian Shi<sup>1</sup> and Lu Gan<sup>1\*</sup>

11

12

13 <sup>1</sup> Department of Biological Sciences and Centre for Bioluminescence Sciences, National  
14 University of Singapore, Singapore 117543

15 <sup>2</sup> Temasek Life Sciences Laboratory, National University of Singapore, Singapore  
16 117604

17 <sup>†</sup> Present address: School of Life Sciences & Chemical Technology, Ngee Ann  
18 Polytechnic, Singapore 599489

19

20 \* Correspondence: [lu@anaphase.org](mailto:lu@anaphase.org)

21 **SUMMARY**

22

23 Chromosomes condense during mitosis in most eukaryotes. This transformation  
24 involves rearrangements at the nucleosome level and has consequences for  
25 transcription, but the details remain unclear. Here, we use cryo-electron tomography to  
26 determine the 3-D arrangement of nucleosomes and other large nuclear features in  
27 frozen-hydrated fission-yeast cells. Nucleosomes can form irregular clusters in both  
28 interphase and mitotic cells, but they are smaller than expected for Hi-C domains. The  
29 nucleosomes are co-mingled with two features: nucleosome-free pockets and  
30 megadalton-sized “megacomplexes”. Compared to interphase, the nucleosomes in  
31 mitotic chromosomes pack into slightly larger clusters. However, nearest-neighbor  
32 distance analysis reveals that mitotic nucleosome clusters have the same internal  
33 packing density as in interphase. Furthermore, mitotic chromosomes contain fewer  
34 megacomplexes. This uneven chromosome condensation helps explain a longstanding  
35 enigma of mitosis: most genes are repressed but a subset is upregulated.

## 36 INTRODUCTION

37

38 Chromatin structure influences key nuclear activities such as transcription, DNA repair  
39 and replication (Dixon et al., 2016). The fundamental unit of chromatin is the  
40 nucleosome, which consists of ~147 bp of DNA wrapped around a histone octamer  
41 Luger, 1997]. In mammalian cells, 2 - 35 nucleosomes pack into irregular “clutches”  
42 (Ricci et al., 2015) and more than 500 nucleosomes (calculated from nucleosome  
43 spacing) are thought to associate as topologically associating domains (Dixon et al.,  
44 2012). Likewise, in the fission yeast *Schizosaccharomyces pombe*, some 300 - 7,000  
45 nucleosomes are thought to associate as compact globular chromatin bodies called  
46 domains (Mizuguchi et al., 2014; Kakui et al., 2017; Tanizawa et al., 2017). These  
47 studies suggest that chromatin higher-order structure arises from physical interactions  
48 of large groups of nucleosomes.

49 In mitotic cells, chromosomes condense into discrete structures that can be  
50 resolved in a light microscope. The factors involved in condensation have been well  
51 characterized (Hirano, 2016) and a number of models have been proposed for the  
52 large-scale organisation of chromatin domains (Maeshima and Eltsov, 2008). However,  
53 the molecular details of chromatin reorganisation are still unknown. Knowledge of how  
54 chromatin condenses in 3-D at the single-nucleosome level is needed to explain the  
55 nearly global transcriptional repression that happens to the mitotic cells of most  
56 eukaryotes (Struhl, 1998). Likewise, a 3-D model of chromatin could also explain how a  
57 subset of genes escape this mitotic repression and get upregulated (Rustici et al.; Oliva  
58 et al.; Peng et al.).

59           Some insights on *in vivo* chromatin organisation were made possible by new  
60 methods, including chromatin-conformation capture (Hi-C), super-resolution  
61 microscopy, and traditional EM of cells stained with DNA-proximal osmium (Beliveau et  
62 al.; Pombo and Dillon, 2015; Ou et al.). However, the resultant models are limited  
63 because these methods rely on population-averaged data, or have low resolution, or  
64 perturb the sample due to the fixation, dehydration and staining. Cryo-EM is a label-free  
65 method to visualize cells in a life-like frozen-hydrated state (McDowall et al., 1986;  
66 Eltsov et al., 2008). Cryo-electron tomography (cryo-ET) goes further and can reveal the  
67 3-D positions of these complexes at ~ 4-nm resolution (Gan and Jensen, 2012). Using  
68 cryo-ET, we previously showed that nucleosomes in picoplankton and budding yeast  
69 pack irregularly, but we did not find evidence for mitotic chromosome compaction (Gan  
70 et al., 2013; Chen et al., 2016).

71           Fission-yeast mitotic-chromosome condensation resembles human chromosome  
72 condensation in both morphological and Hi-C phenotypes (Hiraoka et al., 1984;  
73 Naumova et al., 2013; Yam et al., 2013; Kakui et al., 2017; Tanizawa et al., 2017). We  
74 have now used cryo-ET to directly visualize chromatin both before and after mitotic  
75 condensation *in vivo* in the fission yeasts *S. pombe* and *S. japonicus*. To obtain  
76 cryotomograms with sufficient contrast to resolve nucleosomes *in vivo*, we imaged cells  
77 that were thinned by cryomicrotomy. To better understand the heterogeneous  
78 complexes in the crowded nucleoplasm, we also took advantage of recent advances in  
79 phase-contrast hardware and image-classification software (Bharat and Scheres, 2016;  
80 Khoshouei et al., 2017). We found that in interphase, nucleosomes frequently associate  
81 as small clusters or short chains. Nucleosome-free pockets and megadalton-sized

82 “megacomplexes” are interspersed among these nucleosome clusters. In mitosis,  
83 chromosomes condense unevenly and have slightly larger nucleosome clusters. Mitotic  
84 chromosomes also have nucleosome-free pockets, but fewer megacomplexes. These  
85 phenotypes are conserved in both types of fission yeasts and lead to a model that  
86 explains how some genes can be transcriptionally upregulated in mitosis.

## 87 **RESULTS**

88

### 89 ***S. pombe* subcellular structures are revealed at molecular resolution by cryo-ET**

90 To understand how native chromatin organisation differs between interphase and

91 mitosis, we imaged *S. pombe* cells by cryo-ET of frozen-hydrated sections

92 (cryosections, ~ 90 - 130 nm nominal thickness). To ensure that the imaged cells had a

93 known cell-cycle state, we arrested temperature-sensitive *cdc25-22* cells in G2 phase

94 (Fantès, 1979) and cold-sensitive *nda3-KM311* cells in prometaphase (Hiraoka et al.,

95 1984). Fluorescence microscopy confirmed that the latter cells have the well-known

96 mitotic chromosome-condensation phenotype (Fig. 1A, S1). In a typical cryotomogram

97 of an *S. pombe* cell, we could recognize organelles such as the endoplasmic reticulum,

98 vesicles, and the nucleus due to their membrane morphologies (Fig. 1B and C). To

99 further assess the quality of the cryosections and data, we performed subtomogram

100 averaging of cytoplasmic ribosomes (Fig. S2A, B). The resulting average was similar to

101 a low-pass-filtered budding-yeast ribosome crystal structure (Fig. S1C) (Ben-Shem et

102 al., 2011). Therefore, the conformation of large complexes are preserved at the

103 molecular level.

104

### 105 **Interphase chromatin is arranged as loosely packed nucleosomes and irregular**

### 106 **nucleosome clusters**

107 G2-phase cell nuclei are filled with many nucleosome-like granular densities. For the

108 sake of brevity, herein we call these densities nucleosomes due to their size, shape,

109 abundance, location, and condensation phenotype all being consistent with

110 nucleosomes (see below). Even if a minority of these densities are not nucleosomes,  
111 the conclusions we make below are still valid. Nucleosomes frequently associate as  
112 small irregular clusters less than 50-nm wide (Fig. 2B). Chain-like nucleosome  
113 configurations are also abundant (Fig. 2C). *S. pombe* linker DNA is only 7-bp,  
114 corresponding to ~ 2.5 nm (Lantermann et al., 2010), meaning that most nucleosomes  
115 should pack closely with at least two other nucleosomes. These two nucleosomes  
116 correspond to the -1 and +1 positions in the sequence. Because linker DNA is  
117 unresolved in our cryotomograms, we do not know if a cluster contains nucleosomes  
118 from a single or multiple sequences of nucleosomes. The remaining nucleosomes are  
119 not clustered together (Fig. 2D). Efforts to automatically identify nucleosome clusters  
120 with distinct motifs failed due to the irregular nucleosome packing. Small nucleosome-  
121 free “pockets” (< 50 nm) are also abundant (Fig. 2E). Densities much larger than  
122 nucleosomes (> 20 nm) are spread throughout the nucleus (Fig. 2F). These densities  
123 are consistent with being multi-megadalton nuclear assemblies such as pre-ribosomes,  
124 spliceosomes, and transcription preinitiation complexes (Gleizes et al., 2001; Allen and  
125 Taatjes, 2015; Oesterreich et al., 2016); we call these “megacomplexes” for brevity.  
126 Therefore, in interphase, nucleosomes associate as small irregular clusters that co-  
127 mingle with megacomplexes and nucleosome-free pockets.

128

### 129 **Condensed mitotic chromosomes contain fewer megacomplexes**

130 Unlike in G2-phase cells, in each cryotomogram of a prometaphase cell we found a  
131 single position that has many features consistent with its being a section through a  
132 condensed chromosome. For example, nucleosome-like densities are abundant within

133 these positions, but much rarer outside (Fig. 3A-C). Compared to G2-phase cells, in  
134 which abundant megacomplexes are interspersed with the chromatin (Fig. 2A),  
135 megacomplexes are mostly absent from these large contiguous regions in  
136 prometaphase cells (Fig. 3A). These positions are hundreds of nanometers wide,  
137 matching the size of condensed chromosomes seen by fluorescence microscopy (Fig.  
138 1A, S1). If these positions are indeed chromosomes, there should be a large contiguous  
139 volume in the cell with few megacomplexes. To test this hypothesis, we sampled a  
140 larger nuclear volume by cryo-ET of 5 nearly sequential cryosections (summing to ~ 700  
141 nm thick) of the same cell (Fig. S3A). We saw a single megacomplex-poor region in  
142 each of these cryosections, which is consistent with these positions being sections  
143 through one or two of the three fission-yeast chromosomes (Fig. S3B-F). Taken  
144 together, we located mitotic chromosomes and found they have fewer megacomplexes  
145 within.

146

### 147 **Mitotic chromosomes condense unevenly and support transcription**

148 In conventional (defocus) cryotomograms, we noticed that most nucleosomes appear  
149 more densely packed in prometaphase cells (Fig. S4). To better understand how  
150 chromatin is organised, we imaged cells by Volta phase contrast cryo-ET (Fig. S5).  
151 Volta cryo-EM data have much more contrast, making it possible to locate and  
152 determine the orientations of smaller protein complexes and to resolve protein  
153 complexes packed to near-crystalline density inside of cells (Engel et al., 2015;  
154 Khoshouei et al., 2017). The Volta cryotomograms confirmed what we learned from  
155 defocus cryo-ET: prometaphase nucleosomes more frequently packed into larger



156 clusters (Figs. 4A and B, S5). Importantly, we confirmed the presence of some loosely  
157 packed nucleosomes and pockets in prometaphase cells (Figs. 4C and S5B, D),  
158 meaning that condensation is uneven. In summary, mitotic chromosomes consist of  
159 both densely and loosely packed nucleosomes.

160         The existence of loosely packed nucleosomes in prometaphase cells suggests  
161 that mitotic chromatin is permissive to transcriptional machinery, which is supported by  
162 the observation that some genes are up-regulated during mitosis (Rustici et al., 2004;  
163 Oliva et al., 2005; Peng et al., 2005). However, these earlier studies could not  
164 determine if *S. pombe* undergoes active mitotic RNA polymerase II transcription or if  
165 some stable mRNAs are left over from G2 phase. Phosphorylation of RNA polymerase  
166 II at Serine 2 of the carboxy-terminal domain (CTD) heptamer repeat is a conserved  
167 marker of transcription elongation (Komarnitsky et al., 2000; Harlen and Churchman,  
168 2017). Using immunofluorescence, we confirmed the existence of RNA polymerase II  
169 with phospho-Ser2 CTD, and therefore active transcription, in prometaphase  
170 chromosomes (Fig. S6). To rule out the possibility of abnormal transcriptional activity in  
171 the mutants, we imaged asynchronous wild-type cultures, in which a small minority of  
172 cells was undergoing mitosis. We also detected phospho-Ser2 CTD signal in both early  
173 and late mitotic cells. Therefore, transcription is not shut-down globally in mitotic *S.*  
174 *pombe* cells.

175         To analyse the nucleosome rearrangement more objectively, we performed  
176 template matching to find their 3-D positions in Volta cryotomograms. This analysis  
177 showed that nucleosomes formed clusters in both G2-phase and prometaphase cells,  
178 but appear more crowded in the latter (Fig. 5A, B). If chromosomes condense via a

179 uniform accretion of all nucleosomes, the average nucleosome nearest-neighbor  
180 distance (NND) distribution should shorten. However, the NND distributions of  
181 nucleosome hits in G2-phase and prometaphase cells were indistinguishable (two-tailed  
182 t-test,  $p > 0.05$ ) (Fig. 5C). While mitotic chromatin might not condense by compaction of  
183 nearest-neighbor nucleosomes, they might instead condense from changes in  
184 interactions between groups of nucleosomes. We tested this hypothesis by creating  
185 histograms of 10<sup>th</sup> NNDs and found that the population shifted to shorter distances in  
186 prometaphase cells (two-tailed t-test,  $p < 0.001$ ) (Fig. 5D), which explains the more-  
187 crowded appearance of prometaphase nucleosomes. Taken together, our analyses  
188 reveal that chromosomes condense by the merging of small nucleosome clusters,  
189 resulting in a closer association between distant nucleosomes (Fig. 5E, F).

190 As an alternative approach to studying nucleosomes *in vivo*, we performed cryo-  
191 ET on the undigested chromatin from lysates of G2-phase and prometaphase *S. pombe*  
192 cells. Cryotomograms of cell lysis products can reveal more clearly the positions of  
193 nucleosomes (Cai et al., 2017). Subtomogram averages of nucleosome template-  
194 matching hits revealed unambiguous features of mononucleosomes including the  
195 groove between two DNA gyres (Fig. S7), demonstrating that our template-matching  
196 approach can locate most nucleosomes. In the lysates, there are many large  
197 nucleosome-free pockets wider than 50 nm in G2-phase chromatin. In contrast,  
198 prometaphase chromatin remained as more-compact masses with only a few, smaller  
199 pockets (Fig. S8). Therefore, prometaphase chromatin has denser nucleosome packing  
200 both *in vivo* and *in vitro*.

201

202 ***S. japonicus* and *S. pombe* chromosomes condense by similar means**

203 To test whether the formation of larger nucleosome clusters during condensation is  
204 conserved, we imaged *S. japonicus*, a bigger fission yeast that also undergoes mitotic  
205 condensation (Robinow and Hyams, 1989). *S. japonicus* has the same genome size (~  
206 12Mb) as *S. pombe*, but has a nucleus at least 8-fold more voluminous. Because *S.*  
207 *japonicus* is a less-developed model organism, we used asynchronous wild-type cells.  
208 These cells were frozen, cryosectioned, and subjected to Volta cryo-ET just like for *S.*  
209 *pombe*. To determine whether a cell was in mitosis or interphase at the time of freezing,  
210 we looked for cells with cytoplasmic microtubules, which exist only in interphase, or  
211 cells with nuclear microtubules, which exist only in mitosis (Yam et al., 2013). We found  
212 densely packed nucleosomes in *S. japonicus* mitotic chromosomes (Fig. S9A-D).  
213 Furthermore, NND and 10th-NND analyses showed that the nucleosome NND  
214 distributions were similar in interphase and mitosis (two-tailed t-test,  $p > 0.05$ ), but that  
215 the 10th-NND distribution was shorter in mitosis (two-tailed t-test,  $p < 0.001$ ) (Fig. S9E,  
216 F). Therefore, the formation of larger nucleosome clusters in mitosis is a conserved  
217 phenotype in fission yeasts.

218

219 **Dinucleosomes are irregular *in vivo***

220 The crowded nature of the nucleus makes it unfeasible to manually search for  
221 reproducible nucleosome-packing motifs. We therefore performed reference-free 2-D  
222 class-averaging analysis on di-nucleosomes extracted from our cryotomograms. Our  
223 previous 2-D classification of natural *S. cerevisiae* chromatin *in vitro* showed that  
224 abundant motifs can be found automatically this way (Cai et al., 2017). For example,

225 pairs of nucleosomes sometimes packed face-to-face *in vitro*, which if present *in vivo*  
226 would limit access to regulatory positions like the acidic patch (Luger et al., 1997).  
227 However, the same analysis of di-nucleosomes in *S. pombe* did not reveal any classes  
228 containing face-to-face-packed nucleosomes (Fig. S10), meaning that such inter-  
229 nucleosome interactions must be extremely rare. Instead, di-nucleosomes were packed  
230 irregularly, including edge-to-edge packing, with ~ 3-nm gaps in between. G2-phase  
231 nucleosomes (Fig. S10A and C) were more irregularly packed in terms of the separation  
232 between candidate nucleosomes than in prometaphase cells (Fig. S10B and D). Taken  
233 together, our 2-D classification analyses did not find evidence of ordered nucleosome  
234 packing *in vivo*.

235

### 236 **A subset of nucleosomes may be partially unwrapped**

237 In a rare instances, we were able to resolve densities that resemble linker DNA  
238 spanning two nucleosome-like densities in *S. pombe* G2-phase chromatin (Fig. S11A,  
239 B). Many of these linker-DNA-like densities were much longer than the average ~ 2 nm  
240 expected from MNase-digestion experiments (Fig. S11C-D) and nucleosome-mapping  
241 studies (Lantermann et al., 2010). Furthermore, in the NND analysis, there are a large  
242 number of nucleosome pairs that have NND values greater than 12 nm, i.e., the gaps  
243 between adjacent nucleosomes are wider than 2 nm (Fig. 5C). This inter-nucleosome  
244 gap was absent from tetranucleosomes reconstituted with the same linker DNA length  
245 as *S. pombe* (Ekundayo et al., 2017). One explanation is that the larger inter-  
246 nucleosome separation *in vivo* reflects the high end of the distribution of linker DNA  
247 lengths. Alternatively, some nucleosomes might be partially unwrapped – such as may

248 be expected of fragile or pre-nucleosomes (Fei et al., 2015; Kubik et al., 2015), resulting  
249 in apparently longer linker DNA (Fig. S11E, F). The possibility of partially unwrapped  
250 nucleosomes led us to test whether the nucleosomes *in vivo* resembled  
251 mononucleosomes. To do this, we performed 2-D and 3-D classification of nucleosome  
252 template-matching hits (Bharat and Scheres, 2016). The 3-D classes taken from the  
253 Volta cryotomograms had the correct size and shape of nucleosomes, but they lacked  
254 the characteristic DNA gyres seen in the side view of the low-pass-filtered crystal  
255 structure of the mononucleosome (Fig. S12) (Luger et al., 1997). This difference might  
256 be due to either the insufficient signal-to-noise ratio of cryo-ET data or the  
257 conformational heterogeneity caused by biological factors such as partial unwrapping or  
258 both.

## 259 **DISCUSSION**

260

261 We have directly visualized chromatin in both interphase and mitotic fission-yeast cells  
262 by cryo-ET. The condensation phenotypes are subtle. In both interphase and mitotic  
263 cells, most of the nucleosomes are packed into small irregular clusters. While the  
264 nucleosome clusters are slightly larger in mitosis, the nearest-neighbor distance does  
265 not shorten. In other words, there is no wholesale nucleosome accretion as commonly  
266 depicted in textbooks. The most notable -- yet still subtle -- changes are that mitotic  
267 chromatin contains fewer megacomplexes *in vivo* and that this chromatin remains more  
268 compact than interphase chromatin after being released from lysed cells. We propose a  
269 model of mitotic condensation that incorporates both structural and dynamic principles  
270 that takes into account recently published counter-intuitive Hi-C results (Fig. 6).

271

### 272 **Cryo-ET reveals new insights into higher-order chromatin organisation**

273 One of the long-standing goals of structural cell biology is to determine how a chain of  
274 sequential nucleosomes folds within minimally perturbed cells. Such a model requires  
275 the visualization of all the linker-DNA segments, but cryo-ET at present can resolve only  
276 a tiny minority of this DNA *in vivo*. Despite this limitation, the shortness of fission-yeast  
277 linker DNA (Fig. S10) tightly constrains our interpretation of our cryotomograms. Any  
278 given nucleosome density should have at least two adjacent nucleosome densities,  
279 which correspond to the -1 and +1 sequential positions. Each of these adjacent  
280 nucleosomes would be connected via short linker DNAs to another nucleosome,  
281 corresponding to -2 and +2 positions relative to the middle nucleosome. This line of

282 reasoning fails for nucleosome-depleted positions, but these are in the minority. This  
283 linker-DNA imposed close packing supports our model that nucleosomes form small  
284 clusters and possibly small chains.

285 Our 2-D and 3-D classification analyses suggest that chromatin structure is  
286 irregular from the level of individual nucleosomes to mitotic chromosomes. Unlike the  
287 crystal structure (Luger et al., 1997), nucleosomes *in vivo* are largely conformationally  
288 heterogeneous. This heterogeneity may arise from interactions with small proteins,  
289 assembly/disassembly intermediates, partial unwrapping, or a combination of all these  
290 factors. Out of these possibilities, the partial unwrapping of *S. pombe* nucleosomes *in*  
291 *vivo* was predicted nearly a decade ago (Zlatanova et al., 2009). This variability in  
292 nucleosome structure and linker DNA length can then give rise to irregular  
293 oligonucleosome folding (Wong et al., 2007; Collepardo-Guevara and Schlick, 2014).  
294 Furthermore, the rarity of face-to-face nucleosome packing precludes chromatin-fiber  
295 interdigitation by nucleosome stacking as a major folding motif. Irregular chromatin is  
296 therefore a conserved feature in single-celled eukaryotes (Gan et al., 2013; Chen et al.,  
297 2016). A recent study using a new DNA negative-staining method concluded that  
298 chromatin structure is also irregular in mammalian cells (Ou et al., 2017), which is  
299 consistent with earlier EM studies of other mammalian cells (McDowall et al., 1986;  
300 Eltsov et al., 2008; Fussner et al., 2012; Nishino et al., 2012).

301

### 302 **Cryo-ET, Hi-C, and live-cell imaging paint a complex picture of chromatin**

303 Hi-C is a “proximity-based” method wherein two DNA segments can be detected if they  
304 are close enough to chemically cross-link (Lieberman-Aiden et al., 2009). In this

305 interpretation, Hi-C indirectly probes chromatin structure, and is revealing new principles  
306 of chromatin organization in *S. pombe* (Mizuguchi et al., 2014; Kakui et al., 2017;  
307 Tanizawa et al., 2017). A common Hi-C structural feature is the domain (also called  
308 TADs), a contiguous sequence in which nucleosomes are more likely to interact with  
309 other nucleosomes within this sequence than outside. *S. pombe* domains range from  
310 40kb to 1Mb long, corresponding to 300 - 7,000 sequential nucleosomes. If domains are  
311 monolithic globular bodies as universally depicted in the literature, they should be visible  
312 in our cryotomograms as large, densely packed nucleosomes clusters. Such a cluster  
313 would be 7 - 20 nucleosomes wide, assuming a simple cuboid shape; other globular  
314 shapes would be equally large. The nucleosome clusters we saw were generally much  
315 smaller. We propose that small nucleosome clusters, which we see at the single-cell  
316 level by cryo-ET, correspond to different loci in each cell. If these clusters belong to Hi-  
317 C domains, they would sum to the much-larger structure due the effects of population  
318 averaging. As the simplest example, we illustrate how four sequential nucleosomes  
319 could give rise to a Hi-C structure that is larger than what can be found in individual  
320 cells (Fig. S13). Cell-to-cell variation may also explain differences between single-cell  
321 and population-based Hi-C studies (Nagano et al., 2013; Flyamer et al., 2017; Nagano  
322 et al., 2017; Stevens et al., 2017).

323 Two recent studies unexpectedly reported that short-range Hi-C contacts are less  
324 probable in mitotic *S. pombe* cells than in interphase cells (Kakui et al., 2017; Tanizawa  
325 et al., 2017), echoing a previous study of mitotic human cells (Naumova et al., 2013).  
326 Interestingly, quiescent B cells, which have condensed chromosomes, have lower short-  
327 range Hi-C contact probabilities than active B cells, which have decondensed



328 chromosomes (Kieffer-Kwon et al., 2017). If Hi-C detections arise solely from  
329 nucleosome-nucleosome proximity, then the nucleosomes should move further apart in  
330 mitosis; we observed the opposite. What else, then, could explain the lower short-range  
331 Hi-C contact frequency in mitotic cells? A recent study found that within compact (160  
332 nm) mammalian chromatin domains, all nucleosome motion is correlated (Nozaki et al.,  
333 2017). We propose that short-range Hi-C contacts in *S. pombe* and some mammalian  
334 cells is also dependent on chromatin dynamics (Hihara et al., 2012; Kakui et al., 2017).  
335 These dynamics slow down in mitotic cells due to the increase in nucleosome cluster  
336 size, and lowers the frequency that crosslinkable groups can interact with each other.  
337

### 338 **The role of uneven condensation in transcriptional regulation**

339 The strong correlation between mitotic chromosome condensation and transcriptional  
340 repression is well established (Taylor, 1960; Prescott and Bender, 1962). Mechanistic  
341 evidence of mitotic repression came from the observation that mitotic condensation is  
342 coincident with transcription-factor displacement (Martinez-Balbas et al., 1995). Yet,  
343 even though transcription is largely downregulated in mitotic *S. pombe* cells, (Oliva et  
344 al.), many cell-cycle-regulated genes actually get expressed more (Rustici et al.; Oliva  
345 et al.; Peng et al.). In agreement, our immunofluorescence experiments detected  
346 elongating RNA polymerase II in mitotic *S. pombe* chromosomes. We propose that  
347 chromatin structure at multiple size scales permits access to regulatory sequences,  
348 somewhat independently of dynamics. At the mononucleosome level, many chromatin-  
349 regulatory complexes recognize and bind to the nucleosome's face (McGinty and Tan,  
350 2015). Because face-to-face nucleosome stacking is exceptionally rare in mitotic cells,

351 this critical surface remains available for interactions. At the level of the chromosome,  
352 fewer megacomplexes are interspersed within the densely packed nucleosomes.  
353 However, uneven condensation leaves nucleosome-free positions that could remain  
354 permissive to the occasional passage or assembly of megacomplexes such as  
355 spliceosomes and transcription preinitiation complexes. If uneven chromosome  
356 condensation is highly conserved, the mechanisms proposed here could explain the  
357 recent observations of chromatin accessibility and transcription in mitotic mammalian  
358 cells (Hsiung et al., 2015; Teves et al., 2016; Palozola et al., 2017).

## 359 MATERIALS AND METHODS

360

### 361 Cell culture

362 *S. pombe* cell culture (Forsburg, 2003), G2-phase arrest (Ducommun et al.) and  
363 prometaphase arrest (Hiraoka et al.) were performed as previously reported. *nda3-*  
364 *KM311* cells were grown overnight in yeast-extract supplemented (YES) medium (30  
365 g/L glucose, 5 g/L yeast extract, 225 mg/L adenine, 225 mg/L histidine, 225 mg/L  
366 leucine, 225 mg/L uracil) at 30°C with shaking. When the optical density at 600 nm  
367 ( $OD_{600}$ ) reached ~ 0.2, the cultures were cooled by incubation in a 20°C shaker. After a  
368 10-hr incubation at this lower temperature, more than 90% of cells were arrested in  
369 prometaphase. *cdc25-22* cells were grown in YES medium at 25°C with shaking  
370 overnight. When the  $OD_{600}$  reached ~ 0.2, the cultures were warmed to 36°C in a water  
371 bath and then transferred to a 36°C shaker. After 4 hr, the majority of cells were  
372 arrested at G2 phase. *S. japonicus* cells were grown in YES medium at 30°C with  
373 shaking overnight until mid-log phase ( $OD_{600}$  ~ 0.6) (Yam et al.).

374

### 375 Fluorescence microscopy

376 Cells were stained with 4',6-diamidino-2-phenylindole (DAPI) following a published  
377 protocol (Toda et al.). Cells (1 ml) were fixed with 2.5% formaldehyde for 60 min at the  
378 restrictive temperature for mutants. The cells were washed twice by centrifugation at  
379 1500 x g for 1 min and resuspension with distilled water. They were pelleted at 1500 x g  
380 for 1 min and stained by resuspension in 50 µl PBS, pH 7.4, containing 1 µg/ml DAPI.  
381 Ten µl of the sample was then added to a glass slide and imaged using a PerkinElmer

382 Ultraview Vox Spinning Disc confocal microscope (PerkinElmer, Waltham, MA). Images  
383 were recorded using a 100x oil-immersion objective.

384

### 385 **Immunofluorescence**

386 Log-phase cells (10 ml) were fixed with 3.7% formaldehyde for 90 min at 30°C (or at the  
387 restrictive temperature for arrested mutants). Cells were then pelleted by centrifugation  
388 at 1500 x g for 5 min. Cells were then resuspended in 1 ml PEM buffer (0.1 M PIPES  
389 pH 6.95, 2 mM EGTA, 1 mM MgSO<sub>4</sub>). Cells were washed once with 1 ml PEM this way  
390 and then resuspended in 1 ml PEMS (1.2 M sorbitol in PEM). Next, cells were  
391 spheroplasted for 15 minutes by incubation with lysis-enzyme cocktail (Abcam, cat#  
392 ab206997), diluted 1:1000 in PEMS at 30°C. Cells were washed with PEMS. The pellet  
393 was then resuspended in PEMS with 1% Triton X-100 and incubated at 22°C for 5 min.  
394 Cells were then washed twice with PEM and incubated in PEMBAL (PEM, 1% BSA, 100  
395 mM L-Lysine hydrochloride) at 22°C for 1 hour. Cells were then incubated with rabbit  
396 anti-RNA polymerase II CTD-repeat YSPTSPS (phospho S2) antibody in PEMBAL  
397 (1:1000 dilution) at 22°C for 1 hour. Cells were washed three times with 1 ml PEMBAL  
398 and then incubated with Alexa Fluor 488-coupled donkey anti-rabbit antibodies at 22°C  
399 for 1 hour. Cells were then washed three times with PEM and resuspended in 50 µl of 1  
400 µg/ml DAPI.

401

### 402 **Self-pressurized freezing**

403 Self-pressurized freezing was performed based on a previous method, with  
404 modifications (Yakovlev and Downing, 2011). *S. pombe* cells were grown in YES

405 medium until the OD<sub>600</sub> reached 0.2 - 0.6. Cells were pelleted by centrifuging at 1500 x  
406 g for 5 min. Concentrated dextran stock (40 kDa, 60% w/v, in YES) was added to the  
407 cell pellet as an extracellular cryoprotectant to a final concentration of 30%. The cells  
408 were then quick-spun to remove air bubbles and then loaded into a copper tube (0.45 /  
409 0.3 mm outer / inner diameters) with a syringe-type filler device (Part 733-1,  
410 Engineering Office M. Wohlwend GmbH). The tube was sealed by crimping both ends  
411 with flat-jaw pliers. The sealed tube was held horizontally, ~ 3 cm above the liquid-  
412 ethane cryogen surface, and then dropped in. The flattened ends of the tube were then  
413 removed with a tube-cutting device under liquid nitrogen.

414

#### 415 **Vitreous sectioning**

416 Vitreous sectioning was performed as previously described with modifications (Chen et  
417 al., 2016). A perforated- or continuous-carbon grid was coated with 10-nm gold colloids  
418 as fiducials for cryotomographic alignment. Gold solution (5 µl at  $5.7 \times 10^{12}$  particles/ml)  
419 in 0.1 mg/ml BSA was applied to the grid and then air-dried. Frozen-hydrated cells were  
420 cut into a 70-nm-thick frozen-hydrated ribbon using a 35° diamond knife (Cryo35,  
421 Diatome, Nidau, Switzerland) in a Leica UC7/FC7 cryo-ultramicrotome (Leica  
422 Microsystems, Vienna, Austria) at -150°C. Once the ribbon was ~ 3 mm long, the  
423 colloidal-gold-coated EM grid was placed underneath the ribbon. To minimize occlusion  
424 by grid bars at high tilt during cryotomographic imaging, the grid as aligned so that the  
425 ribbon was in between and parallel with the grid bars. The ribbon was then attached to  
426 the grid by operating the Crion in “charge” mode for ~ 30 seconds. The grid was stored  
427 in liquid nitrogen until imaging.

428

### 429 **Cell lysis**

430 Log-phase *S. pombe* cells were pelleted by centrifuging at 1500 x g for 5 min and then  
431 spheroplasted for 15 minutes by incubation with lysis-enzyme cocktail at either 30°C or  
432 at the restrictive temperature for mutants. The spheroplasts were pelleted at 1500 x g  
433 for 2 min at 22°C and then lysed in 20 µl lysis buffer (50 mM EDTA and a 1:1000  
434 dilution of protease inhibitor cocktail, Abcam, cat# ab206997) on ice for 15 min.

435

### 436 **Plunge freezing**

437 Plunge freezing was done using a Vitrobot Mk IV (Thermo, Waltham, MA) operated at  
438 4°C with 80% humidity. *S. pombe* cell lysates (4 µl) were applied to a freshly glow-  
439 discharged perforated-carbon grid. The grid was blotted once (blot force: 1, blot time: 3  
440 seconds) with filter paper (Whatman #1001055) and then plunged into liquid ethane.

441

### 442 **Cryo-electron tomography**

443 Tilt series were collected using FEI TOMO4 on a Titan Krios cryo-TEM (Thermo,  
444 Waltham, MA) operated at 300 KeV and equipped with a field-emission gun, a Volta  
445 phase-plate device, and a Falcon II direct-detection camera. Details of the imaging  
446 parameters are shown in Table S1. Image alignment, CTF compensation, low-pass  
447 filtering, and 3-D reconstruction were all done using the IMOD software package  
448 (Kremer et al., 1996; Mastronarde, 1997; Xiong et al., 2009). Note that Volta  
449 cryotomograms were not CTF compensated. Cryotomograms were visualized as

450 tomographic slices with 3dmod and as isosurfaces with UCSF Chimera (Pettersen et  
451 al., 2004).

452

### 453 **Template matching**

454 Template matching was done using PEET (Heumann, 2016). A manually-selected  
455 subtomogram containing a nucleosome-like particle served as a template. The influence  
456 of the surrounding nucleoplasmic densities were suppressed by the application of a  
457 spherical mask. A search was performed on a grid with a 10-nm spacing within the  
458 nucleus. Template-matching hits within 6 nm were considered as duplicates and the  
459 extra hit was automatically removed. The cross-correlation coefficient cutoff criteria  
460 were the same as in our previous report (Cai et al., 2017). Briefly, the average cross-  
461 correlation coefficients of all template-matching hits was used as an initial cutoff. This  
462 cutoff was then manually adjusted (if needed) to minimize the number of detectable  
463 false positives and false negatives. To further remove false positives from  
464 megacomplexes, another round of template matching was performed using a ribosome-  
465 like density selected within the tomogram as a template. The nucleosome hits that were  
466 within 12.5 nm of these megacomplexes were then removed with a Matlab script  
467 (available on request; Mathworks, Natick, MA).

468 For dinucleosome template matching, a manually-selected subtomogram of a di-  
469 nucleosome served as a template. A cylindrical mask (15-nm diameter, 22-nm height),  
470 rotated to align with the long axis of the dinucleosome template, was used to suppress  
471 the background surrounding densities. The search grid with a 25-nm spacing was  
472 generated within the nucleus. Owing to the missing-wedge artifact, nucleosomes have

473 higher resolution in the X-Y plane. Therefore, the angular search was limited only to the  
474 Z axis. Hits within 15 nm were considered as duplicates. The cross-correlation  
475 coefficient cutoff criteria were the same as described above for mononucleosomes.  
476 False positives from megacomplexes fell into their own classes in the subsequent 2-D  
477 classification run (see below) and were removed.

478

#### 479 **Reference-free 2-D and 3-D classification**

480 Subtomogram classification and 3-D averaging of nucleosomes were done in RELION  
481 1.4 and RELION 2.0 (Scheres, 2012a, b; Bharat et al., 2015; Kimanius et al., 2016),  
482 following the workflow of our previous study (Cai et al., 2017). The template-matching  
483 hit coordinates were imported into RELION and then particles were extracted with a  
484 15.6-nm box and masked with a 13.5-nm-diameter sphere. For 2-D classification, the  
485 number of classes was set to 50 and the resolution of was limited to 3 nm. All  
486 nucleosome-like classes were selected. For 3-D classification, the number of classes  
487 was set to between 10 and 20, and the resolution was limited to 2-3 nm. Two to three  
488 rounds of 3-D classification were performed. False-positive were manually removed in  
489 between rounds.

490 For di-nucleosome 2-D classification, the box size and the mask diameter were  
491 set to 30 nm and 26 nm, respectively. As a default setting, RELION produces  
492 projections of all densities within the boxes, including the nucleoplasmic densities above  
493 and below dinucleosomes. To include only the dinucleosome densities, a python script  
494 (available on request) was used to generate projections from a 17.5-nm thick  
495 tomographic slice. The resolution of the data was limited to 2 nm to suppress the effects



496 of high-resolution noise. The number of classes was set to 100, but many of the classes  
497 were very similar and therefore merged.

498

#### 499 **Nearest-neighbor distance analysis**

500 Nearest-neighbor distance analysis of template-matching hits (Figs. 5 and S9) was  
501 performed as previously described (Cai et al., 2017). The coordinates of the  
502 nucleosome hits were imported into Matlab. NND and 10<sup>th</sup> NND were calculated using  
503 the Matlab function `nearestneighbour.m` (custom script available on request).

504

#### 505 **Statistical analysis**

506 Two-tailed t-tests for NND values were performed in Excel using the TTEST function.  
507 The number of NND values analysed for G2-phase and prometaphase *S. pombe*,  
508 interphase and mitotic *S. japonicus* were 10292, 11835, 9397, 4474, respectively.

509

#### 510 **Data sharing**

511 A cryotomogram, corresponding to Fig. 4, was deposited in the EMDataBank as EMD-  
512 6846. The tilt series for all cryotomograms presented in this manuscript were deposited  
513 in the Electron Microscopy Public Image Archive as EMPIAR-10125.

514

#### 515 **Acknowledgements**

516 We thank the CBIS microscopy staff for support and training. We thank Snezhka  
517 Oliferenko for advice on *S. japonicus* culture and manuscript feedback; Mohan  
518 Balasubramanian for feedback and sharing *S. pombe* strains; Kazuhiro Maeshima for

519 feedback. *S. japonicus* strains were obtained from JapoNet. SC, CC, ZT and LG were  
520 supported by NUS startups R-154-000-515-133, R-154-000-524-651, and D-E12-303-  
521 154-217, R-154-000-558-133, and MOE T2 R-154-000-624-112.

522

### 523 **Contributions**

524 S.C - experiments, project design, writing, CC - training, YH - training, ZYT -  
525 experiments, JS - training, LG - project design, writing.

526

527 **References**

- 528 Allen, B.L., and Taatjes, D.J. (2015). The Mediator complex: a central integrator of  
529 transcription. *Nature reviews Molecular cell biology* 16, 155-166.
- 530 Beliveau, B.J., Boettiger, A.N., Avendano, M.S., Jungmann, R., McCole, R.B., Joyce,  
531 E.F., Kim-Kiselak, C., Bantignies, F., Fonseka, C.Y., Erceg, J., *et al.* (2015). Single-  
532 molecule super-resolution imaging of chromosomes and in situ haplotype visualization  
533 using Oligopaint FISH probes. *Nature communications* 6, 7147.
- 534 Ben-Shem, A., Garreau de Loubresse, N., Melnikov, S., Jenner, L., Yusupova, G., and  
535 Yusupov, M. (2011). The structure of the eukaryotic ribosome at 3.0 Å resolution.  
536 *Science* 334, 1524-1529.
- 537 Bharat, T.A., Russo, C.J., Lowe, J., Passmore, L.A., and Scheres, S.H. (2015).  
538 Advances in Single-Particle Electron Cryomicroscopy Structure Determination applied  
539 to Sub-tomogram Averaging. *Structure* 23, 1743-1753.
- 540 Bharat, T.A., and Scheres, S.H. (2016). Resolving macromolecular structures from  
541 electron cryo-tomography data using subtomogram averaging in RELION. *Nat Protoc*  
542 11, 2054-2065.
- 543 Cai, S., Song, Y., Chen, C., Shi, J., and Gan, L. (2017). Natural Chromatin Is  
544 Heterogeneous And Self Associates In Vitro. *bioRxiv*, 139543.
- 545 Chen, C., Lim, H.H., Shi, J., Tamura, S., Maeshima, K., Surana, U., and Gan, L. (2016).  
546 Budding yeast chromatin is dispersed in a crowded nucleoplasm in vivo. *Molecular*  
547 *biology of the cell* 27, 3357-3368.
- 548 Colleparado-Guevara, R., and Schlick, T. (2014). Chromatin fiber polymorphism triggered  
549 by variations of DNA linker lengths. *Proceedings of the National Academy of Sciences*  
550 *of the United States of America* 111, 8061-8066.
- 551 Dixon, J.R., Gorkin, D.U., and Ren, B. (2016). Chromatin Domains: The Unit of  
552 Chromosome Organization. *Molecular cell* 62, 668-680.

- 553 Dixon, J.R., Selvaraj, S., Yue, F., Kim, A., Li, Y., Shen, Y., Hu, M., Liu, J.S., and Ren, B.  
554 (2012). Topological domains in mammalian genomes identified by analysis of chromatin  
555 interactions. *Nature* 485, 376-380.
- 556 Ducommun, B., Draetta, G., Young, P., and Beach, D. (1990). Fission yeast cdc25 is a  
557 cell-cycle regulated protein. *Biochemical and biophysical research communications* 167,  
558 301-309.
- 559 Ekundayo, B., Richmond, T.J., and Schalch, T. (2017). Capturing Structural  
560 Heterogeneity in Chromatin Fibers. *Journal of molecular biology* 429, 3031-3042.
- 561 Eltsov, M., Maclellan, K.M., Maeshima, K., Frangakis, A.S., and Dubochet, J. (2008).  
562 Analysis of cryo-electron microscopy images does not support the existence of 30-nm  
563 chromatin fibers in mitotic chromosomes in situ. *Proceedings of the National Academy*  
564 *of Sciences of the United States of America* 105, 19732-19737.
- 565 Engel, B.D., Schaffer, M., Kuhn Cuellar, L., Villa, E., Plitzko, J.M., and Baumeister, W.  
566 (2015). Native architecture of the *Chlamydomonas* chloroplast revealed by in situ cryo-  
567 electron tomography. *Elife* 4.
- 568 Fantes, P. (1979). Epistatic gene interactions in the control of division in fission yeast.  
569 *Nature* 279, 428-430.
- 570 Fei, J., Torigoe, S.E., Brown, C.R., Khuong, M.T., Kassavetis, G.A., Boeger, H., and  
571 Kadonaga, J.T. (2015). The prenucleosome, a stable conformational isomer of the  
572 nucleosome. *Genes & development* 29, 2563-2575.
- 573 Flyamer, I.M., Gassler, J., Imakaev, M., Brandao, H.B., Ulianov, S.V., Abdennur, N.,  
574 Razin, S.V., Mirny, L.A., and Tachibana-Konwalski, K. (2017). Single-nucleus Hi-C  
575 reveals unique chromatin reorganization at oocyte-to-zygote transition. *Nature* 544, 110-  
576 114.
- 577 Forsburg, S.L. (2003). Growth and manipulation of *S. pombe*. *Current Protocols in*  
578 *Molecular Biology*, 13.16. 11-13.16. 17.

- 579 Fussner, E., Strauss, M., Djuric, U., Li, R., Ahmed, K., Hart, M., Ellis, J., and Bazett-  
580 Jones, D.P. (2012). Open and closed domains in the mouse genome are configured as  
581 10-nm chromatin fibres. *EMBO Rep* 13, 992-996.
- 582 Gan, L., and Jensen, G.J. (2012). Electron tomography of cells. *Quarterly reviews of*  
583 *biophysics* 45, 27-56.
- 584 Gan, L., Ladinsky, M.S., and Jensen, G.J. (2013). Chromatin in a marine picoeukaryote  
585 is a disordered assemblage of nucleosomes. *Chromosoma* 122, 377-386.
- 586 Gleizes, P.E., Noaillac-Depeyre, J., Leger-Silvestre, I., Teulieres, F., Dauxois, J.Y.,  
587 Pommet, D., Azum-Gelade, M.C., and Gas, N. (2001). Ultrastructural localization of  
588 rRNA shows defective nuclear export of preribosomes in mutants of the Nup82p  
589 complex. *The Journal of cell biology* 155, 923-936.
- 590 Harlen, K.M., and Churchman, L.S. (2017). The code and beyond: transcription  
591 regulation by the RNA polymerase II carboxy-terminal domain. *Nature reviews*  
592 *Molecular cell biology* 18, 263-273.
- 593 Heumann, J.M. (2016). PEET (University of Colorado Boulder).
- 594 Hihara, S., Pack, C.G., Kaizu, K., Tani, T., Hanafusa, T., Nozaki, T., Takemoto, S.,  
595 Yoshimi, T., Yokota, H., Imamoto, N., *et al.* (2012). Local nucleosome dynamics  
596 facilitate chromatin accessibility in living mammalian cells. *Cell reports* 2, 1645-1656.
- 597 Hirano, T. (2016). Condensin-Based Chromosome Organization from Bacteria to  
598 Vertebrates. *Cell* 164, 847-857.
- 599 Hiraoka, Y., Toda, T., and Yanagida, M. (1984). The NDA3 gene of fission yeast  
600 encodes beta-tubulin: a cold-sensitive *nda3* mutation reversibly blocks spindle formation  
601 and chromosome movement in mitosis. *Cell* 39, 349-358.
- 602 Hsiung, C.C., Morrissey, C.S., Udugama, M., Frank, C.L., Keller, C.A., Baek, S.,  
603 Giardine, B., Crawford, G.E., Sung, M.H., Hardison, R.C., *et al.* (2015). Genome

- 604 accessibility is widely preserved and locally modulated during mitosis. *Genome Res* 25,  
605 213-225.
- 606 Kakui, Y., Rabinowitz, A., Barry, D.J., and Uhlmann, F. (2017). Condensin-mediated  
607 remodeling of the mitotic chromatin landscape in fission yeast. *Nat Genet* 49, 1553-  
608 1557.
- 609 Khoshouei, M., Radjainia, M., Baumeister, W., and Danev, R. (2017). Cryo-EM structure  
610 of haemoglobin at 3.2 Å determined with the Volta phase plate. *Nature communications*  
611 8, 16099.
- 612 Kieffer-Kwon, K.R., Nimura, K., Rao, S.S.P., Xu, J., Jung, S., Pekowska, A., Dose, M.,  
613 Stevens, E., Mathe, E., Dong, P., *et al.* (2017). Myc Regulates Chromatin  
614 Decompaction and Nuclear Architecture during B Cell Activation. *Molecular cell* 67, 566-  
615 578 e510.
- 616 Kimanius, D., Forsberg, B.O., Scheres, S.H., and Lindahl, E. (2016). Accelerated cryo-  
617 EM structure determination with parallelisation using GPUs in RELION-2. *Elife* 5.
- 618 Komarnitsky, P., Cho, E.J., and Buratowski, S. (2000). Different phosphorylated forms  
619 of RNA polymerase II and associated mRNA processing factors during transcription.  
620 *Genes & development* 14, 2452-2460.
- 621 Kremer, J.R., Mastrorade, D.N., and McIntosh, J.R. (1996). Computer visualization of  
622 three-dimensional image data using IMOD. *Journal of structural biology* 116, 71-76.
- 623 Kubik, S., Bruzzone, M.J., Jacquet, P., Falcone, J.L., Rougemont, J., and Shore, D.  
624 (2015). Nucleosome Stability Distinguishes Two Different Promoter Types at All Protein-  
625 Coding Genes in Yeast. *Molecular cell* 60, 422-434.
- 626 Lantermann, A.B., Straub, T., Stralfors, A., Yuan, G.C., Ekwall, K., and Korber, P.  
627 (2010). *Schizosaccharomyces pombe* genome-wide nucleosome mapping reveals  
628 positioning mechanisms distinct from those of *Saccharomyces cerevisiae*. *Nat Struct*  
629 *Mol Biol* 17, 251-257.

- 630 Lieberman-Aiden, E., van Berkum, N.L., Williams, L., Imakaev, M., Ragoczy, T., Telling,  
631 A., Amit, I., Lajoie, B.R., Sabo, P.J., Dorschner, M.O., *et al.* (2009). Comprehensive  
632 mapping of long-range interactions reveals folding principles of the human genome.  
633 *Science* 326, 289-293.
- 634 Luger, K., Mader, A.W., Richmond, R.K., Sargent, D.F., and Richmond, T.J. (1997).  
635 Crystal structure of the nucleosome core particle at 2.8 Å resolution. *Nature* 389, 251-  
636 260.
- 637 Maeshima, K., and Eltsov, M. (2008). Packaging the genome: the structure of mitotic  
638 chromosomes. *J Biochem* 143, 145-153.
- 639 Martinez-Balbas, M.A., Dey, A., Rabindran, S.K., Ozato, K., and Wu, C. (1995).  
640 Displacement of sequence-specific transcription factors from mitotic chromatin. *Cell* 83,  
641 29-38.
- 642 Mastronarde, D.N. (1997). Dual-axis tomography: an approach with alignment methods  
643 that preserve resolution. *Journal of structural biology* 120, 343-352.
- 644 McDowell, A.W., Smith, J.M., and Dubochet, J. (1986). Cryo-electron microscopy of  
645 vitrified chromosomes in situ. *EMBO J* 5, 1395-1402.
- 646 McGinty, R.K., and Tan, S. (2015). Nucleosome structure and function. *Chem Rev* 115,  
647 2255-2273.
- 648 Mizuguchi, T., Fudenberg, G., Mehta, S., Belton, J.M., Taneja, N., Folco, H.D.,  
649 FitzGerald, P., Dekker, J., Mirny, L., Barrowman, J., *et al.* (2014). Cohesin-dependent  
650 globules and heterochromatin shape 3D genome architecture in *S. pombe*. *Nature* 516,  
651 432-435.
- 652 Nagano, T., Lubling, Y., Stevens, T.J., Schoenfelder, S., Yaffe, E., Dean, W., Laue,  
653 E.D., Tanay, A., and Fraser, P. (2013). Single-cell Hi-C reveals cell-to-cell variability in  
654 chromosome structure. *Nature* 502, 59-64.

- 655 Nagano, T., Lubling, Y., Varnai, C., Dudley, C., Leung, W., Baran, Y., Mendelson  
656 Cohen, N., Wingett, S., Fraser, P., and Tanay, A. (2017). Cell-cycle dynamics of  
657 chromosomal organization at single-cell resolution. *Nature* 547, 61-67.
- 658 Naumova, N., Imakaev, M., Fudenberg, G., Zhan, Y., Lajoie, B.R., Mirny, L.A., and  
659 Dekker, J. (2013). Organization of the mitotic chromosome. *Science* 342, 948-953.
- 660 Nishino, Y., Eltsov, M., Joti, Y., Ito, K., Takata, H., Takahashi, Y., Hihara, S., Frangakis,  
661 A.S., Imamoto, N., Ishikawa, T., *et al.* (2012). Human mitotic chromosomes consist  
662 predominantly of irregularly folded nucleosome fibres without a 30-nm chromatin  
663 structure. *EMBO J* 31, 1644-1653.
- 664 Nozaki, T., Imai, R., Tanbo, M., Nagashima, R., Tamura, S., Tani, T., Joti, Y., Tomita,  
665 M., Hibino, K., Kanemaki, M.T., *et al.* (2017). Dynamic Organization of Chromatin  
666 Domains Revealed by Super-Resolution Live-Cell Imaging. *Molecular cell* 67, 282-293  
667 e287.
- 668 Oesterreich, F.C., Herzel, L., Straube, K., Hujer, K., Howard, J., and Neugebauer, K.M.  
669 (2016). Splicing of Nascent RNA Coincides with Intron Exit from RNA Polymerase II.  
670 *Cell* 165, 372-381.
- 671 Oliva, A., Rosebrock, A., Ferrezuelo, F., Pyne, S., Chen, H., Skiena, S., Futcher, B.,  
672 and Leatherwood, J. (2005). The cell cycle-regulated genes of *Schizosaccharomyces*  
673 *pombe*. *PLoS Biol* 3, e225.
- 674 Ou, H.D., Phan, S., Deerinck, T.J., Thor, A., Ellisman, M.H., and O'Shea, C.C. (2017).  
675 ChromEMT: Visualizing 3D chromatin structure and compaction in interphase and  
676 mitotic cells. *Science* 357.
- 677 Palozola, K.C., Donahue, G., Liu, H., Grant, G.R., Becker, J.S., Cote, A., Yu, H., Raj, A.,  
678 and Zaret, K.S. (2017). Mitotic transcription and waves of gene reactivation during  
679 mitotic exit. *Science* 358, 119-122.



- 680 Peng, X., Karuturi, R.K., Miller, L.D., Lin, K., Jia, Y., Kondu, P., Wang, L., Wong, L.S.,  
681 Liu, E.T., Balasubramanian, M.K., *et al.* (2005). Identification of cell cycle-regulated  
682 genes in fission yeast. *Molecular biology of the cell* 16, 1026-1042.
- 683 Pettersen, E.F., Goddard, T.D., Huang, C.C., Couch, G.S., Greenblatt, D.M., Meng,  
684 E.C., and Ferrin, T.E. (2004). UCSF Chimera--a visualization system for exploratory  
685 research and analysis. *J Comput Chem* 25, 1605-1612.
- 686 Pombo, A., and Dillon, N. (2015). Three-dimensional genome architecture: players and  
687 mechanisms. *Nature reviews Molecular cell biology* 16, 245-257.
- 688 Prescott, D.M., and Bender, M.A. (1962). Synthesis of RNA and protein during mitosis  
689 in mammalian tissue culture cells. *Exp Cell Res* 26, 260-268.
- 690 Ricci, M.A., Manzo, C., Garcia-Parajo, M.F., Lakadamyali, M., and Cosma, M.P. (2015).  
691 Chromatin fibers are formed by heterogeneous groups of nucleosomes in vivo. *Cell* 160,  
692 1145-1158.
- 693 Robinow, C.F., and Hyams, J.S. (1989). General Cytology of Fission Yeasts. In  
694 *Molecular biology of the fission yeast*, A. Nasim, P. Young, and B.F. Johnson, eds. (San  
695 Diego: Academic Press), pp. 273-330.
- 696 Rustici, G., Mata, J., Kivinen, K., Lio, P., Penkett, C.J., Burns, G., Hayles, J., Brazma,  
697 A., Nurse, P., and Bahler, J. (2004). Periodic gene expression program of the fission  
698 yeast cell cycle. *Nat Genet* 36, 809-817.
- 699 Scheres, S.H. (2012a). A Bayesian view on cryo-EM structure determination. *Journal of*  
700 *molecular biology* 415, 406-418.
- 701 Scheres, S.H. (2012b). RELION: implementation of a Bayesian approach to cryo-EM  
702 structure determination. *Journal of structural biology* 180, 519-530.
- 703 Stevens, T.J., Lando, D., Basu, S., Atkinson, L.P., Cao, Y., Lee, S.F., Leeb, M.,  
704 Wohlfahrt, K.J., Boucher, W., O'Shaughnessy-Kirwan, A., *et al.* (2017). 3D structures of  
705 individual mammalian genomes studied by single-cell Hi-C. *Nature* 544, 59-64.

- 706 Struhl, K. (1998). Histone acetylation and transcriptional regulatory mechanisms. *Genes*  
707 & development 12, 599-606.
- 708 Tanizawa, H., Kim, K.D., Iwasaki, O., and Noma, K.I. (2017). Architectural alterations of  
709 the fission yeast genome during the cell cycle. *Nat Struct Mol Biol*.
- 710 Taylor, J.H. (1960). Nucleic acid synthesis in relation to the cell division cycle. *Ann N Y*  
711 *Acad Sci* 90, 409-421.
- 712 Teves, S.S., An, L., Hansen, A.S., Xie, L., Darzacq, X., and Tjian, R. (2016). A dynamic  
713 mode of mitotic bookmarking by transcription factors. *Elife* 5.
- 714 Toda, T., Yamamoto, M., and Yanagida, M. (1981). Sequential alterations in the nuclear  
715 chromatin region during mitosis of the fission yeast *Schizosaccharomyces pombe*: video  
716 fluorescence microscopy of synchronously growing wild-type and cold-sensitive *cdc*  
717 mutants by using a DNA-binding fluorescent probe. *J Cell Sci* 52, 271-287.
- 718 White, C.L., Suto, R.K., and Luger, K. (2001). Structure of the yeast nucleosome core  
719 particle reveals fundamental changes in internucleosome interactions. *EMBO J* 20,  
720 5207-5218.
- 721 Wong, H., Victor, J.M., and Mozziconacci, J. (2007). An all-atom model of the chromatin  
722 fiber containing linker histones reveals a versatile structure tuned by the nucleosomal  
723 repeat length. *PloS one* 2, e877.
- 724 Xiong, Q., Mophew, M.K., Schwartz, C.L., Hoenger, A.H., and Mastronarde, D.N.  
725 (2009). CTF determination and correction for low dose tomographic tilt series. *Journal of*  
726 *structural biology* 168, 378-387.
- 727 Yakovlev, S., and Downing, K.H. (2011). Freezing in sealed capillaries for preparation of  
728 frozen hydrated sections. *J Microsc* 244, 235-247.
- 729 Yam, C., Gu, Y., and Oliferenko, S. (2013). Partitioning and remodeling of the  
730 *Schizosaccharomyces japonicus* mitotic nucleus require chromosome tethers. *Current*  
731 *biology* : CB 23, 2303-2310.

732 Zlatanova, J., Bishop, T.C., Victor, J.M., Jackson, V., and van Holde, K. (2009). The  
733 nucleosome family: dynamic and growing. *Structure* 17, 160-171.

734

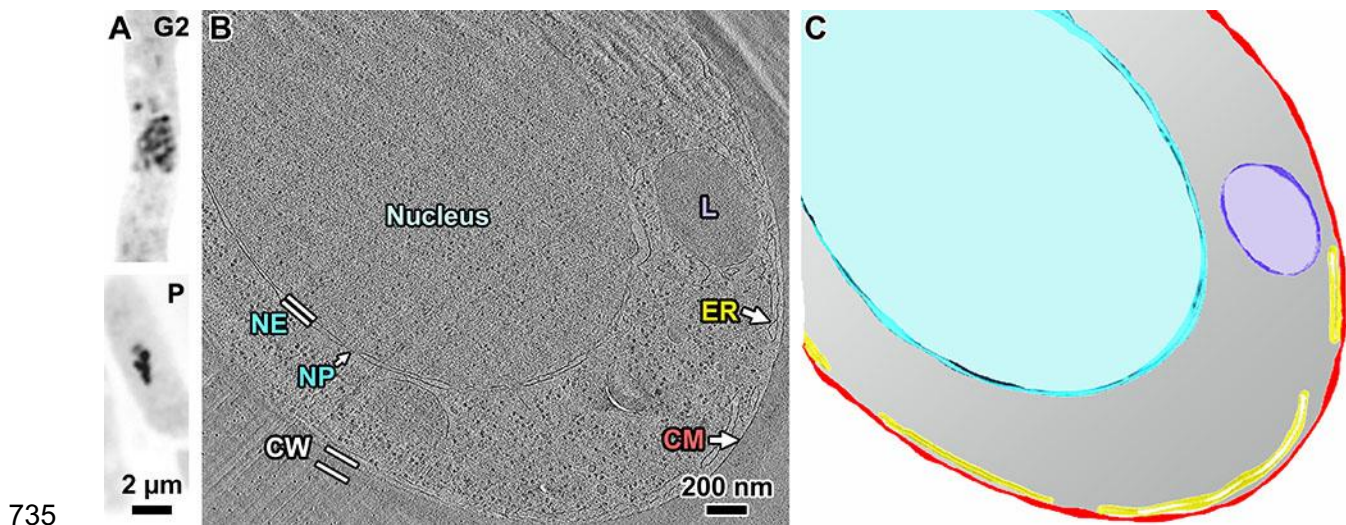

735

736 **Figure 1. Strategy to study chromosome condensation in *S. pombe*.**

737 (A) Fluorescence images of DAPI-stained G2-phase and prometaphase (P) cells, with  
738 contrast inverted for clarity. (B) Cryotomographic slice (25 nm) of a G2-phase cell. NE:  
739 nuclear envelope; NP: nuclear pore; L: lipid body; ER: endoplasmic reticulum; CM: cell  
740 membrane; CW: cell wall. The wavy features in the upper portion of the cryotomogram  
741 are crevasses from sectioning; the thin parallel lines running from 2 to 8 O'clock are  
742 knife marks. (C) Segmentation of the cryotomographic slice in panel B, showing the  
743 cytological features with the same color scheme as the text labels from panel A.

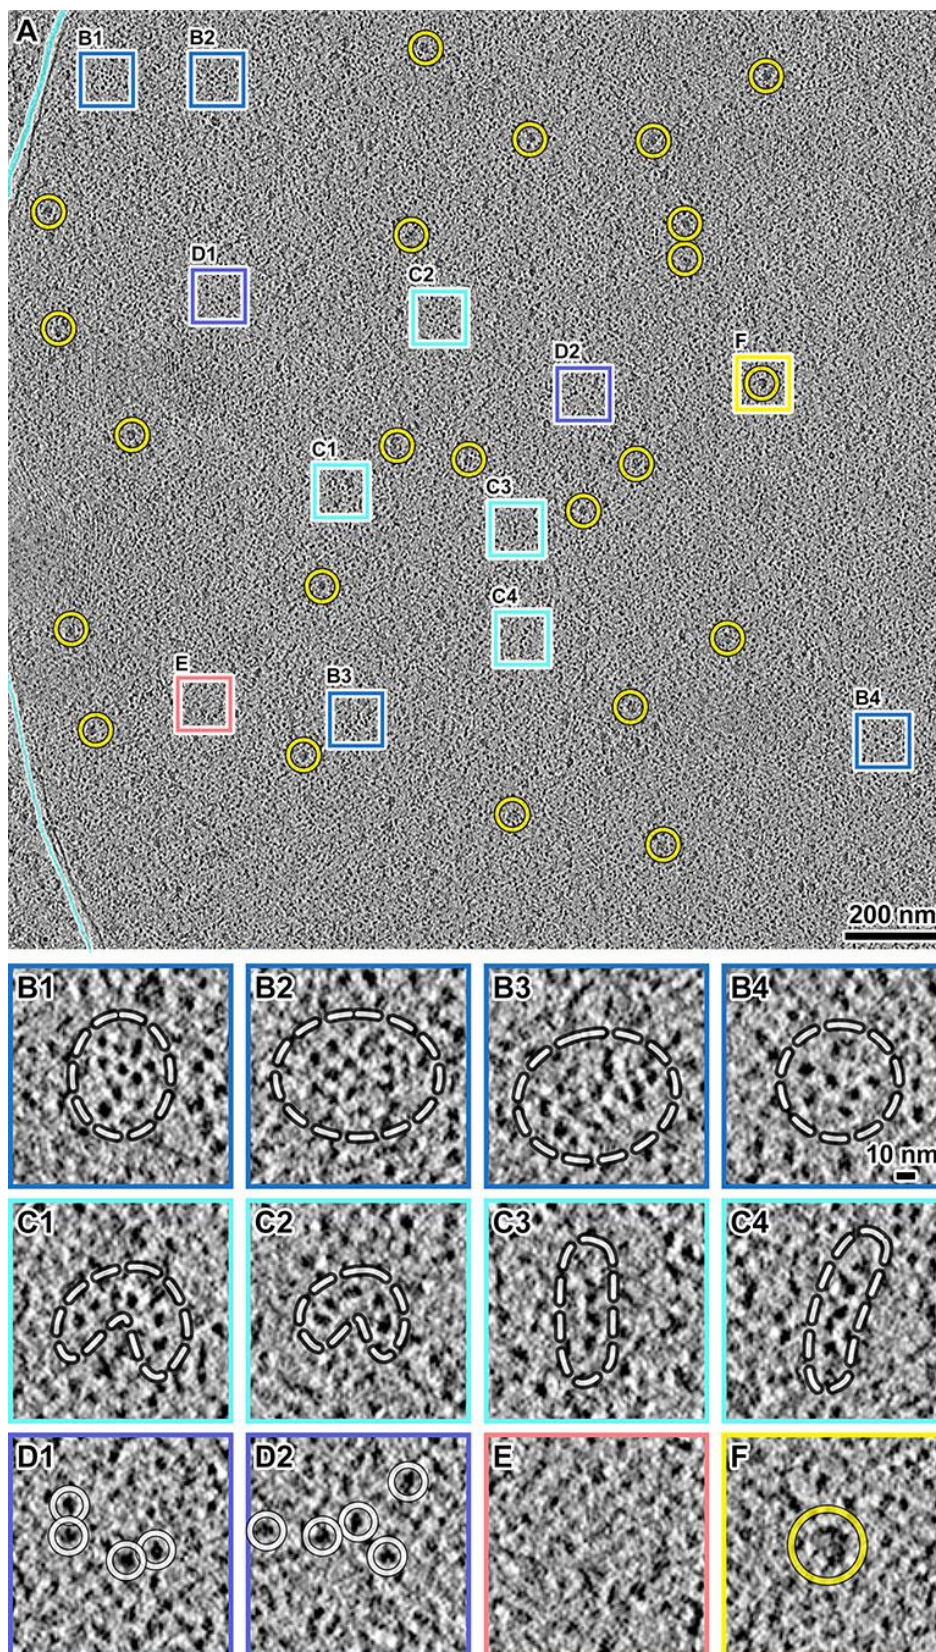

744

745 **Figure 2. *S. pombe* G2-phase chromatin consists of irregularly packed**  
746 **nucleosomes and dispersed megacomplexes.**

747 (A) Cryotomographic slice (10 nm) of an interphase nucleus. Yellow circles: a subset of  
748 megacomplexes. The cyan lines denote the nuclear envelope. (B1 - B4) Four examples  
749 of nucleosome clusters. (C1 - C4) Four examples of nucleosome chains. In panels B  
750 and C, the white dashed lines delineate the approximate boundaries of the nucleosome  
751 clusters. Owing to the close packing and particulate nature of nucleosomes, it is not  
752 possible to annotate the exact “outline” of a nucleosome cluster. It is also not possible to  
753 determine how the nucleosomes are connected by linker DNAs, which generally cannot  
754 be seen. (D1 - D2) Two examples of loosely packed nucleosomes, which are circled.  
755 (E) An example position that has few nucleosomes. (F) An example megacomplex  
756 (circled).

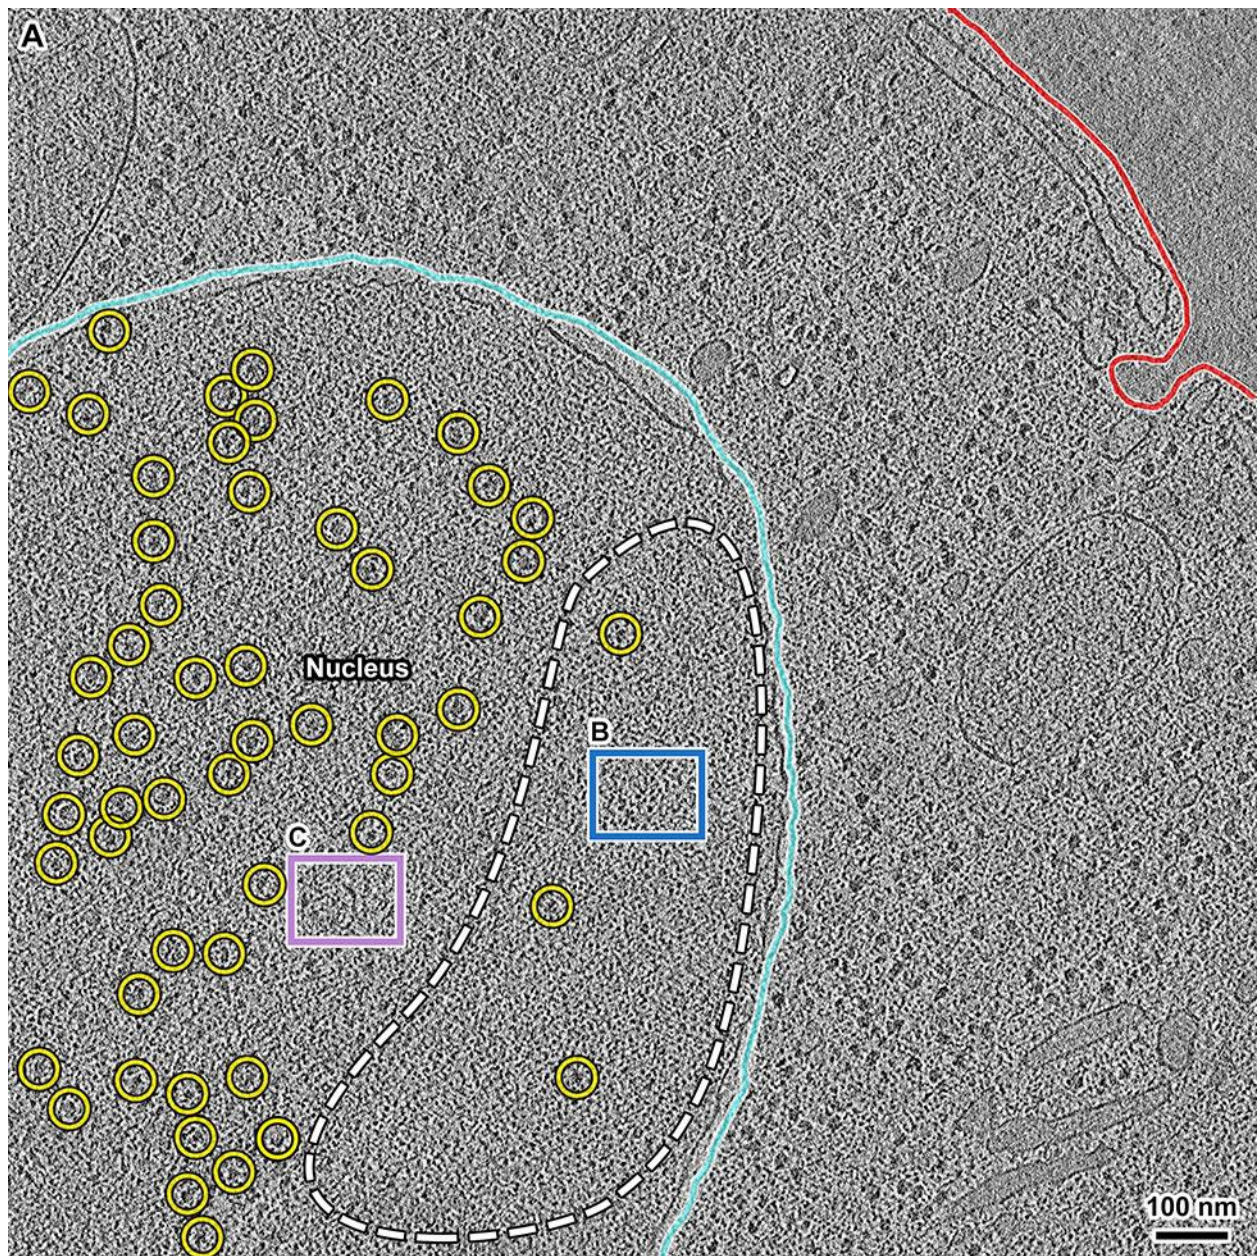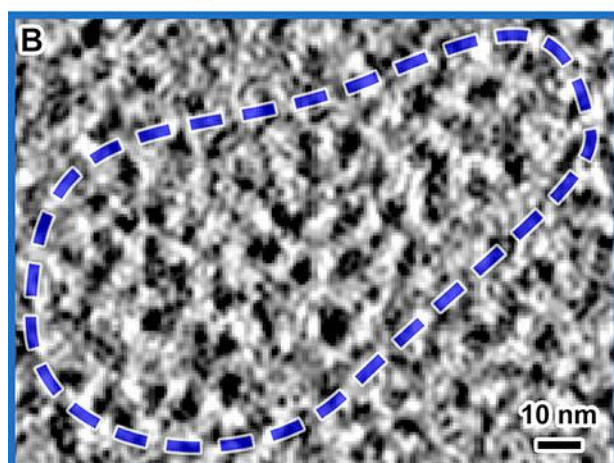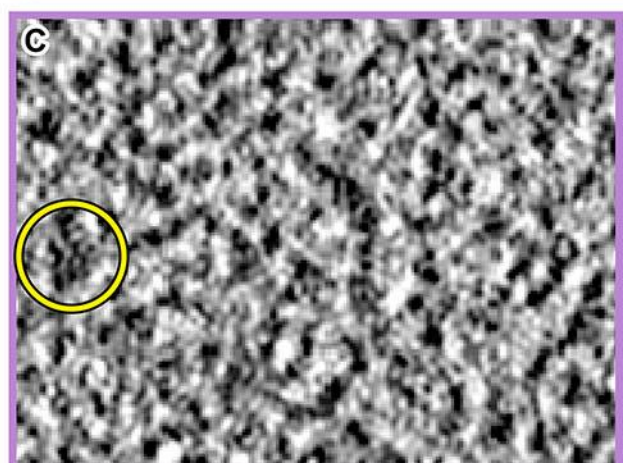

757

758 **Figure 3. Condensed *S. pombe* mitotic chromosomes contain few**  
759 **megacomplexes.**  
760 (A) Cryotomographic slice (11 nm) of a prometaphase cell. Cyan line: nuclear envelope,  
761 red line: plasma membrane, yellow circles: megacomplexes. The position circled with  
762 the dashed white line is a condensed chromosome. Rectangular boxes are enlarged 6-  
763 fold in panels B and C. (B) An example position with many nucleosome-like densities  
764 forming a cluster, circled with a dashed blue line. (C) An example position without  
765 nucleosome-like densities. Yellow circle: a megacomplex.



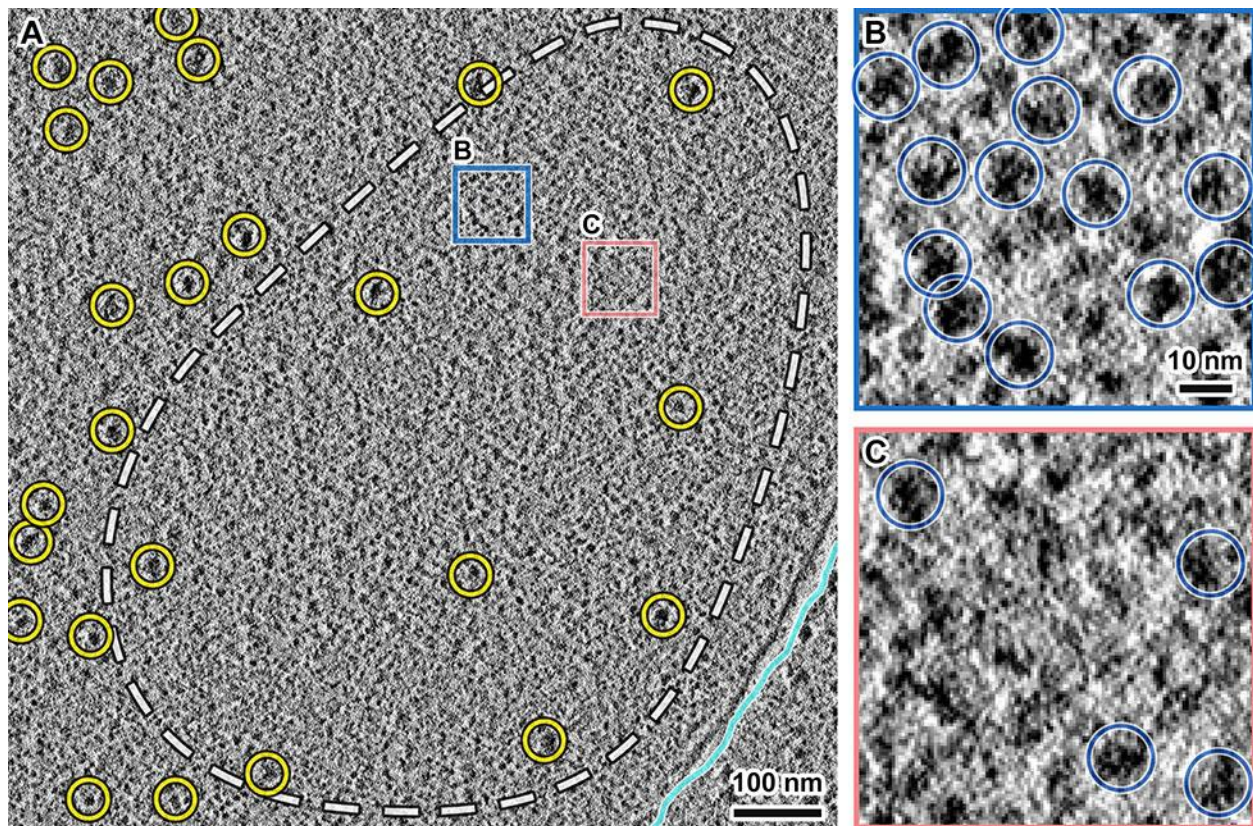

766

767 **Figure 4: Larger nucleosome clusters and loosely packed nucleosomes coexist**  
768 **within *S. pombe* mitotic condensed chromosomes.**

769 (A) Cryotomographic slice (11 nm) of a nucleus in a prometaphase cell, imaged with  
770 Volta phase contrast. White dashed line: approximate chromosome boundary. Yellow  
771 circles: megacomplexes. The positions in the blue and salmon boxes are enlarged six-  
772 fold in panels B and C, respectively. (B) A position within the mitotic chromosome that  
773 contains many closely packed nucleosomes. (C) A position within the mitotic  
774 chromosome that contains fewer, loosely packed nucleosomes. Blue circles:  
775 nucleosomes.

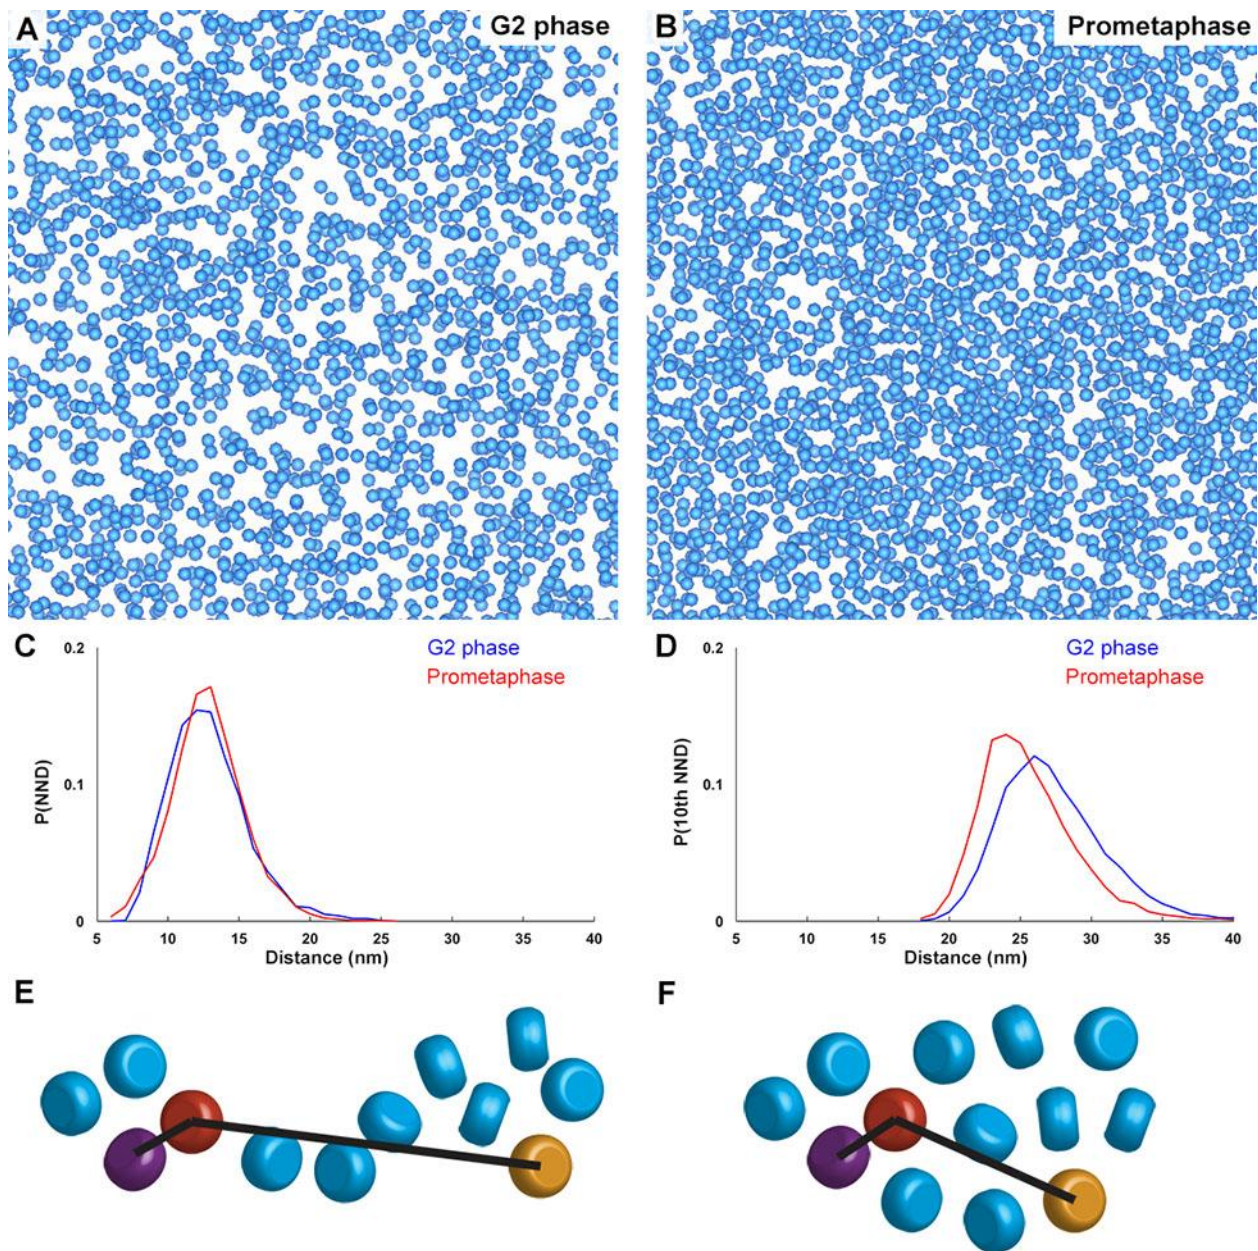

776

777

778 **Figure 5: *S. pombe* nucleosome clusters are larger in prometaphase but have the**  
779 **same local packing density.**

780 (A and B) Template-matching hits of nucleosome positions (blue spheres) in Volta

781 cryotomograms of a G2-phase (A) and a prometaphase (B) cell. (C) Nearest-neighbor

782 distance (NND) analysis of template-matching hits. X-axis: NND, 1-nm bins, Y-axis:

783 normalized probability. (D) Tenth NND analysis of template-matching hits. The X- and  
784 Y- axes are the same as in panel C. (E and F) Cartoons showing how a small (E) and a  
785 large cluster (F) of nucleosomes (rounded cylinders) could have the same NND, but  
786 different 10<sup>th</sup> NND. In each panel, the purple and orange nucleosomes are the  
787 respective nearest and 10<sup>th</sup>-nearest neighbors of the red nucleosome. These cartoons  
788 do not show linker DNA, most of which cannot be seen in the Volta cryotomograms.

789

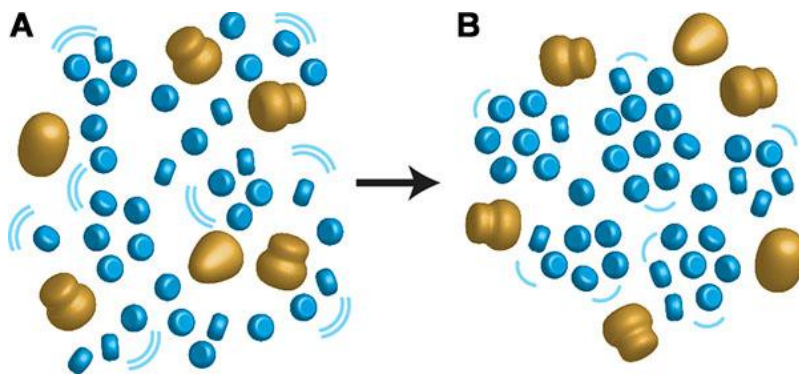

790

791 **Figure 6: Mitotic chromatin is slightly more compact and less dynamic.**

792 (A) Interphase chromatin consists of both small nucleosome clusters and loosely  
793 packed nucleosomes. Blue pills: nucleosome; large gold bodies: megacomplexes.  
794 Megacomplexes (pre-ribosomes, spliceosomes, transcription preinitiation complexes)  
795 are interspersed between the nucleosomes and nucleosome-free pockets. (B) In  
796 condensed mitotic chromosomes, most nucleosomes form large clusters, thereby  
797 excluding or inhibiting the assembly of megacomplexes. Furthermore, chromatin  
798 dynamics (magnitude proportional to the size and number of the curved lines) also  
799 decrease. In both interphase and mitotic chromatin, ordered motifs such as face-to-face  
800 nucleosome-nucleosome interactions are largely absent.

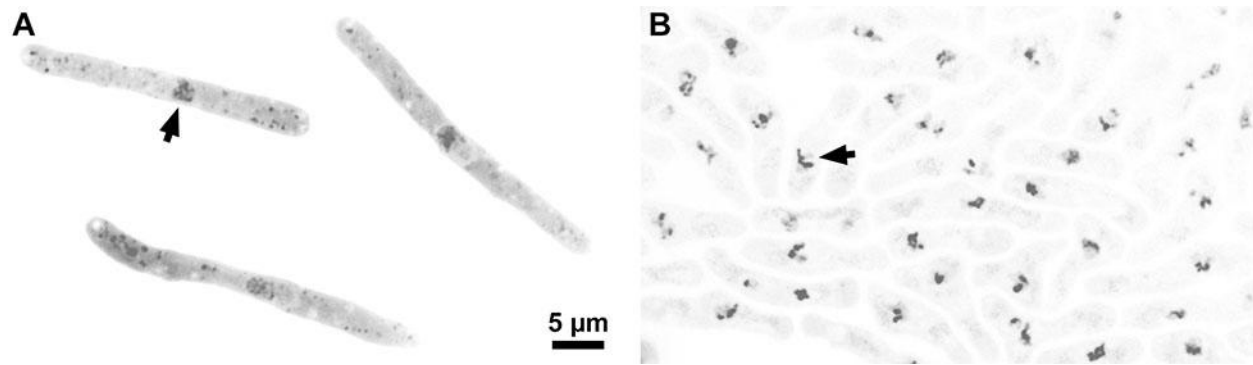

801

802 **Figure S1: Synchronisation of *S. pombe*.**

803 (A and B) Fluorescence micrographs of DAPI-stained G2-phase (A) and prometaphase

804 (B) cells. The contrast is inverted for clarity. Arrows point to an example nucleus in each

805 panel.

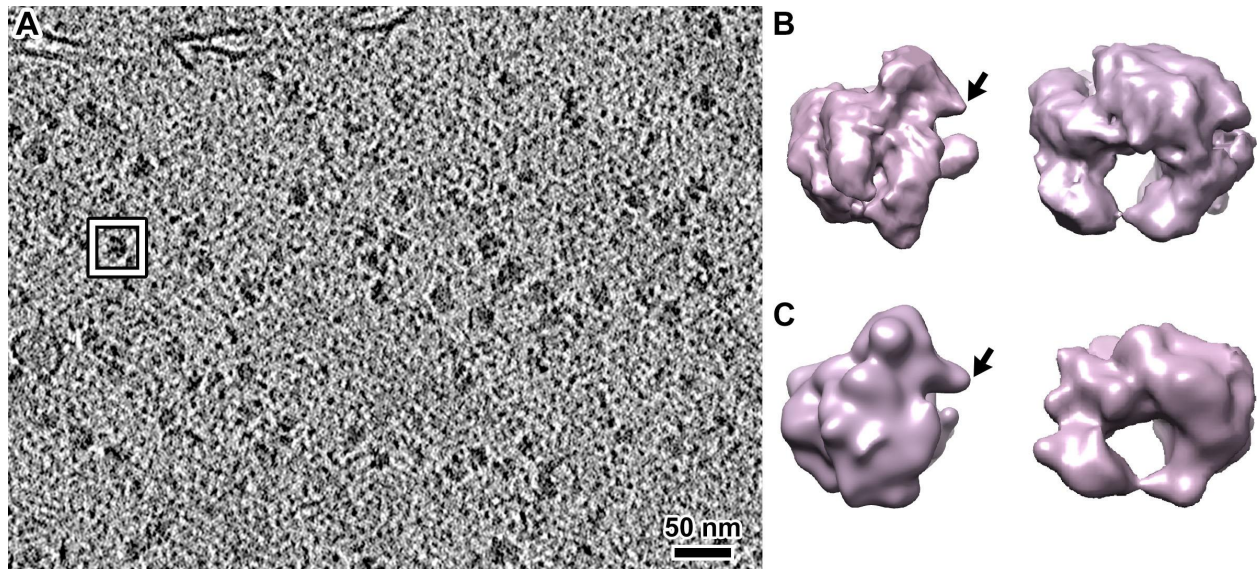

806

807 **Figure S2. Cryotomograms reveal molecular detail *in vivo*.**

808 (A) Cryotomographic slice (25 nm) of a *S. pombe* cytoplasm position that contains many  
809 ribosomes, from the cell shown in Fig. 1B and C. (B) Subtomogram average of  
810 cytoplasmic ribosomes. (C) Crystal structure of *S. cerevisiae* 80S ribosome (PDB 4V88;  
811 (Ben-Shem et al., 2011)), low-pass filtered to 50 Ångstroms resolution. In panels B and  
812 C, the left image is related to the right image by a 90° rotation around the vertical axis,  
813 followed by a 180° rotation around the horizontal axis. Notice that in the orientation  
814 presented on the left, the “beak” motif (arrow) points to the right in both the simulated  
815 density map and the subtomogram average, indicating that the cryotomogram has the  
816 correct handedness. The two maps are not expected to be identical because the  
817 cytoplasmic ribosome map is an average of multiple conformational states.

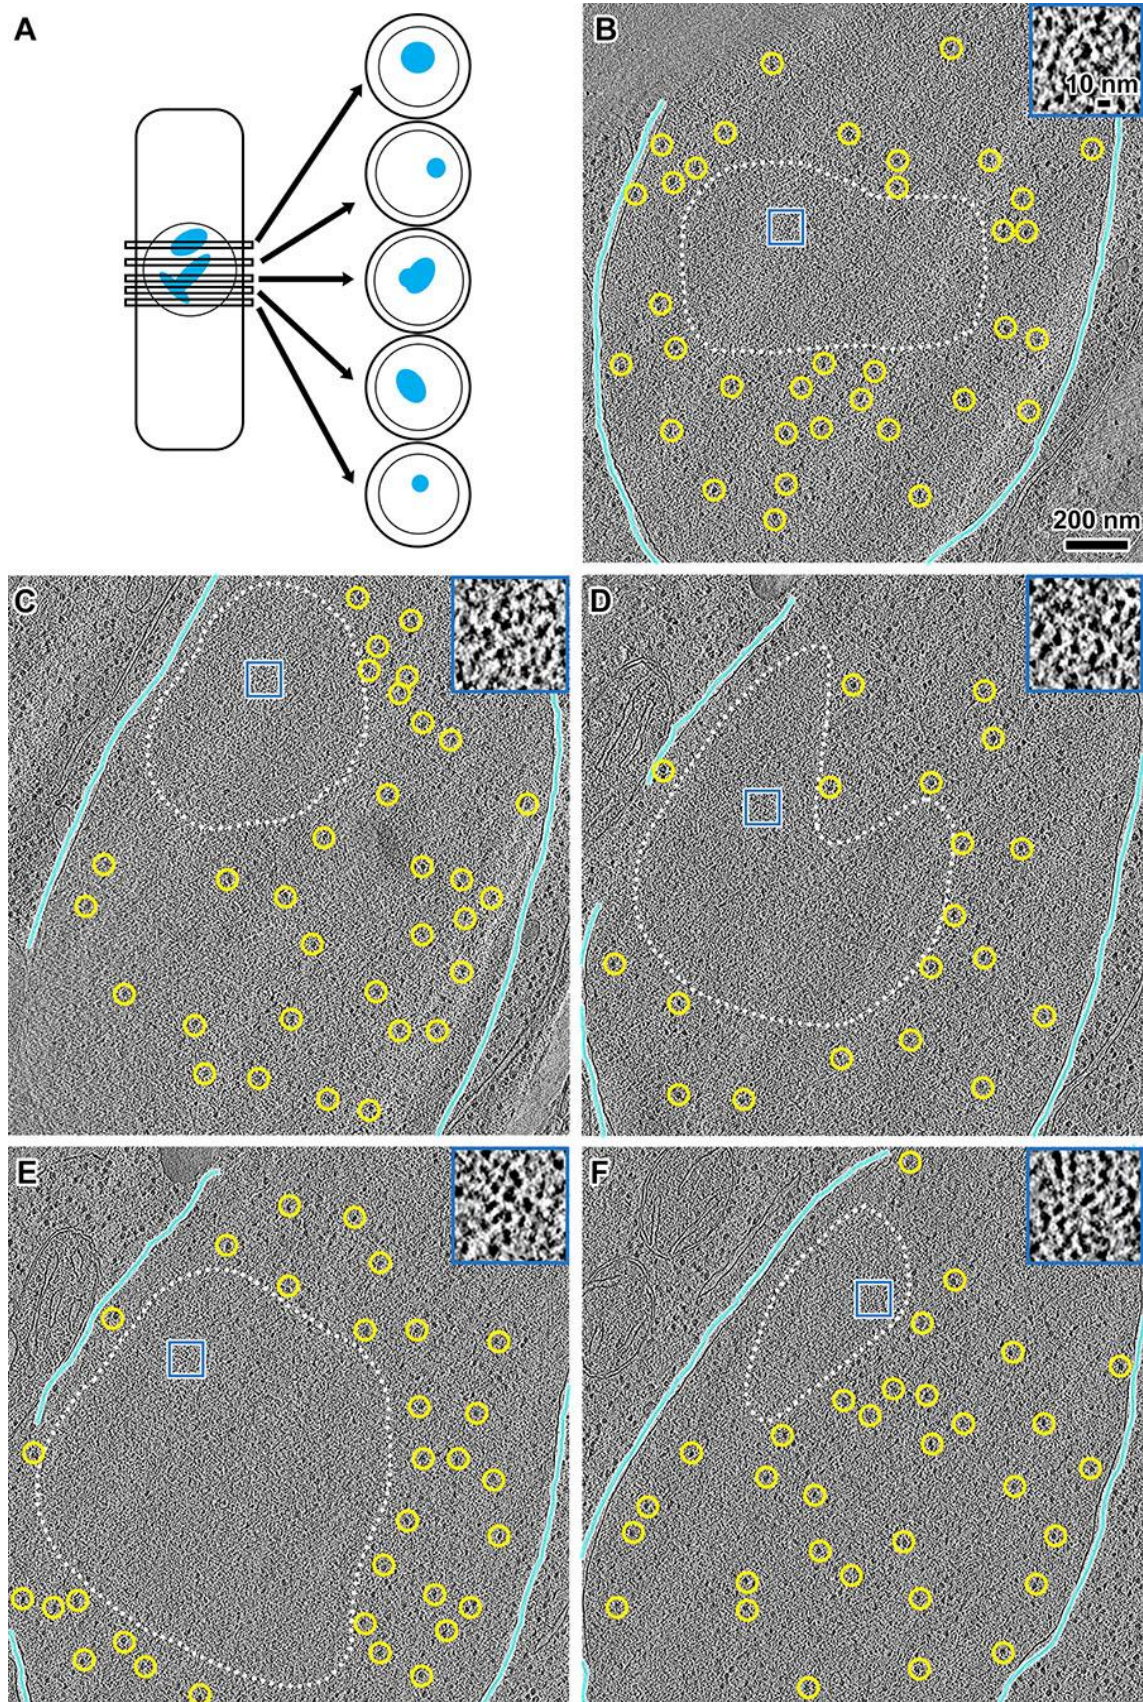

819 **Figure S3. Serial cryotomography reveals the location of mitotic chromosomes.**

820 (A) A cartoon showing nearly serial cryosections of a cell. Some cryosections were not

821 imaged due to ice contamination, damage, grid-bar blockage, etc. (B - F)

822 Cryotomographic slices (10 nm) of nearly serial cryosections from a single

823 prometaphase cell. Cyan lines delineate the nuclear envelope; there are gaps where the

824 nuclear envelope densities were ambiguous. Dotted lines: approximate boundaries of

825 condensed chromosomes. Yellow circles: examples of megacomplexes. For clarity, the

826 few megacomplexes inside the dotted lines lines are not annotated. Inset: four-fold

827 enlargements of blue boxes.



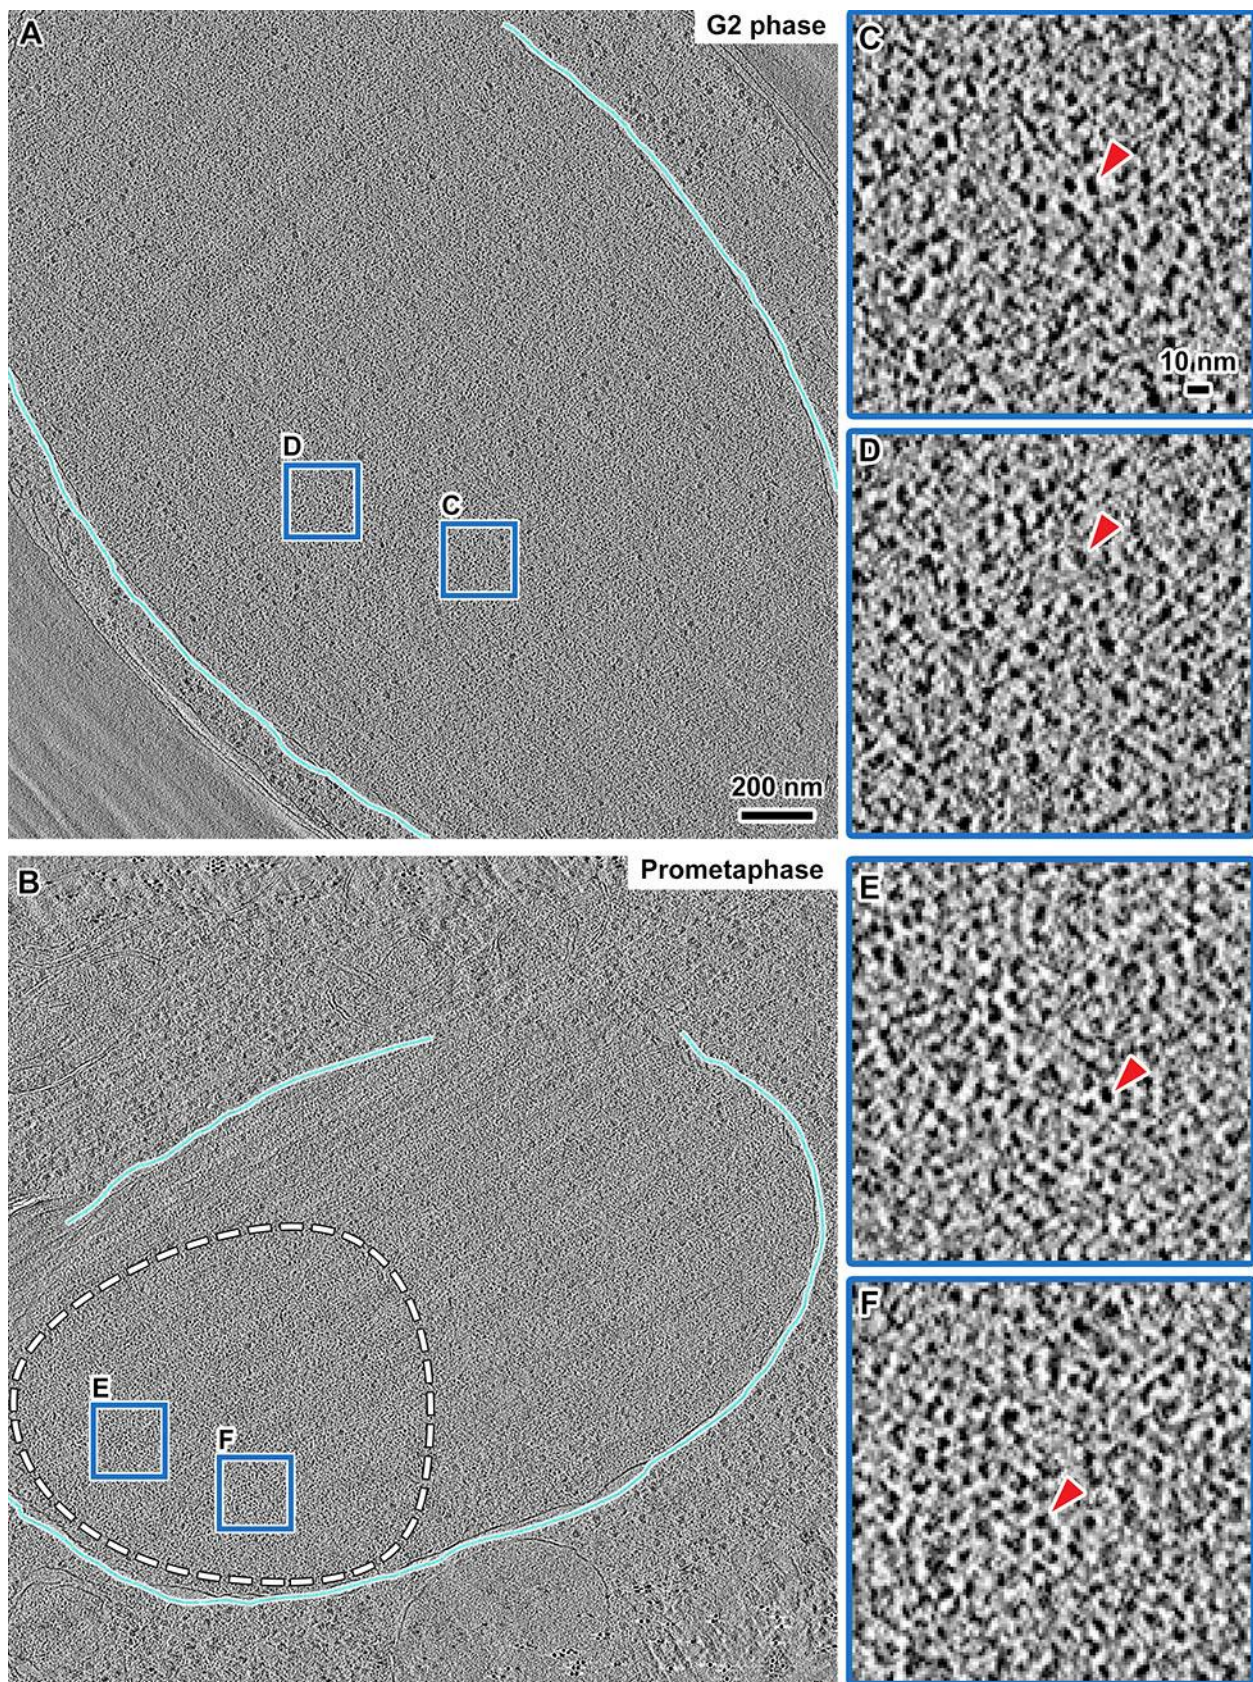

828

829 **Figure S4. An example of nucleosome reorganisation in prometaphase cells.**  
830 (A and B) Cryotomographic slices (11 nm) of nuclei in a G2-phase (A) and a  
831 prometaphase (B) cell. The cyan lines denote the nuclear envelope; there are gaps  
832 where the nuclear-envelope densities were ambiguous. Dashed circle in panel B:  
833 approximate outline of a condensed chromosome. (C - F) Six-fold enlargements of  
834 intranuclear positions that are enriched in nucleosomes, from the corresponding boxes  
835 in panels A and B. Red arrowheads point to nucleosomes.

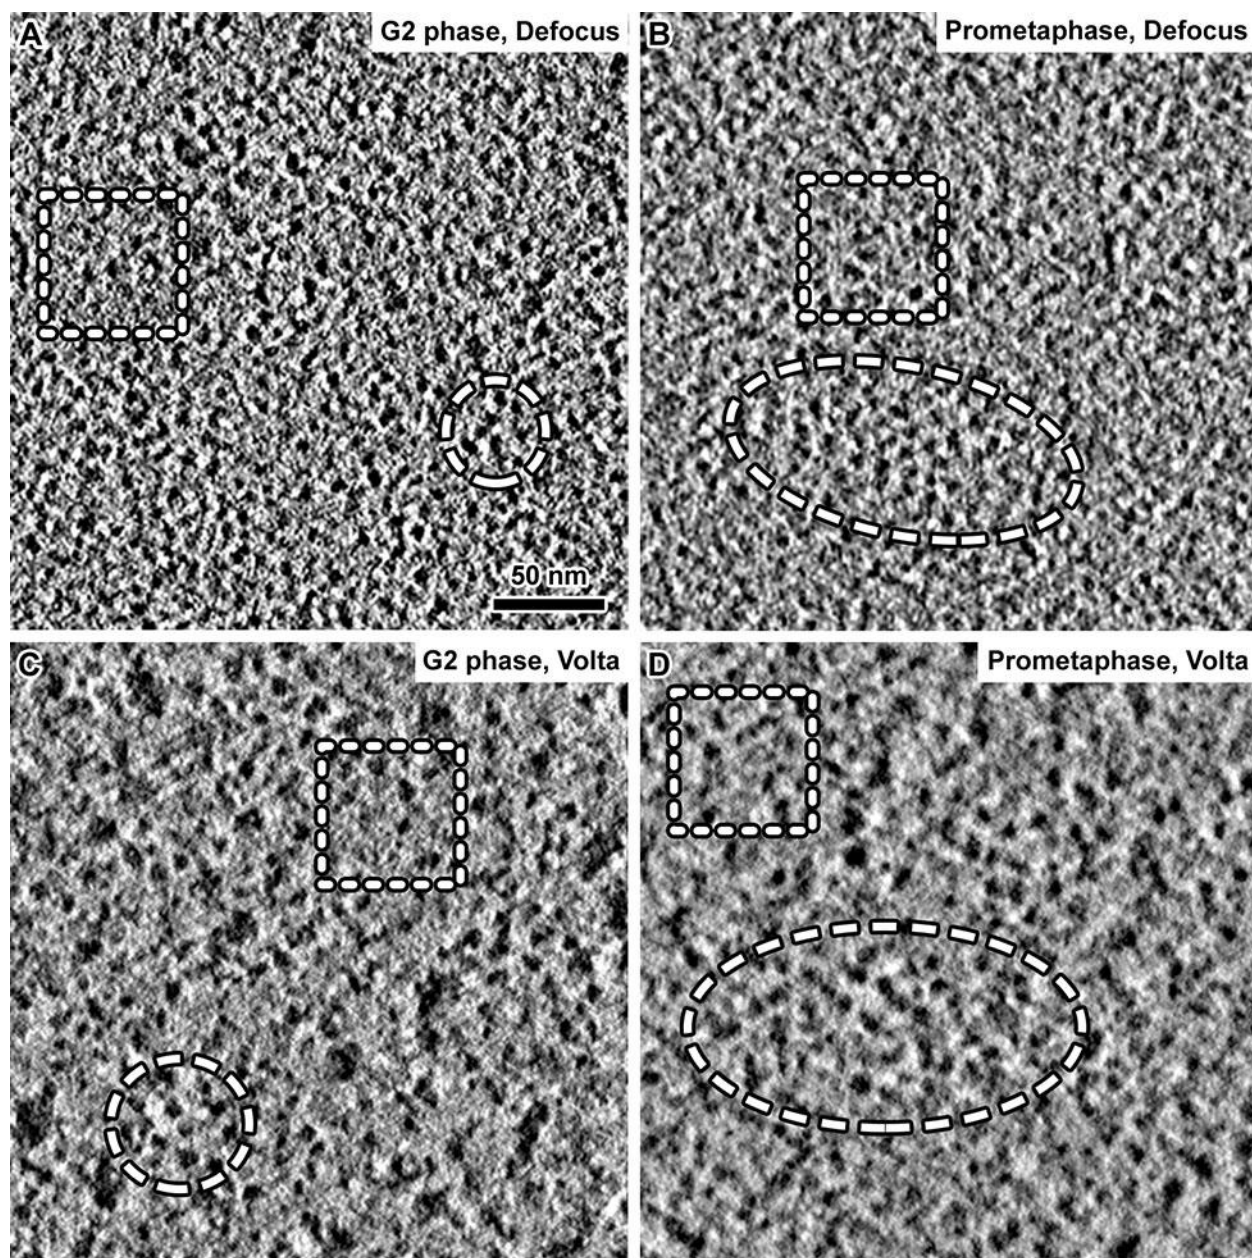

836

837 **Figure S5. Nucleosome reorganisation is distinguishable in both defocus and**  
838 **Volta cryotomograms.**

839 (A and C) Cryotomographic slices (10 nm) of positions in G2-phase chromatin imaged

840 with defocus (A) and Volta (C) phase contrast. (B and D) Cryotomographic slices (10

841 nm) of positions in prometaphase chromatin imaged with defocus (B) or Volta (D) phase

842 contrast. Dashed circles: densely packed nucleosomes. Dashed squares: loosely-  
843 packed nucleosomes.

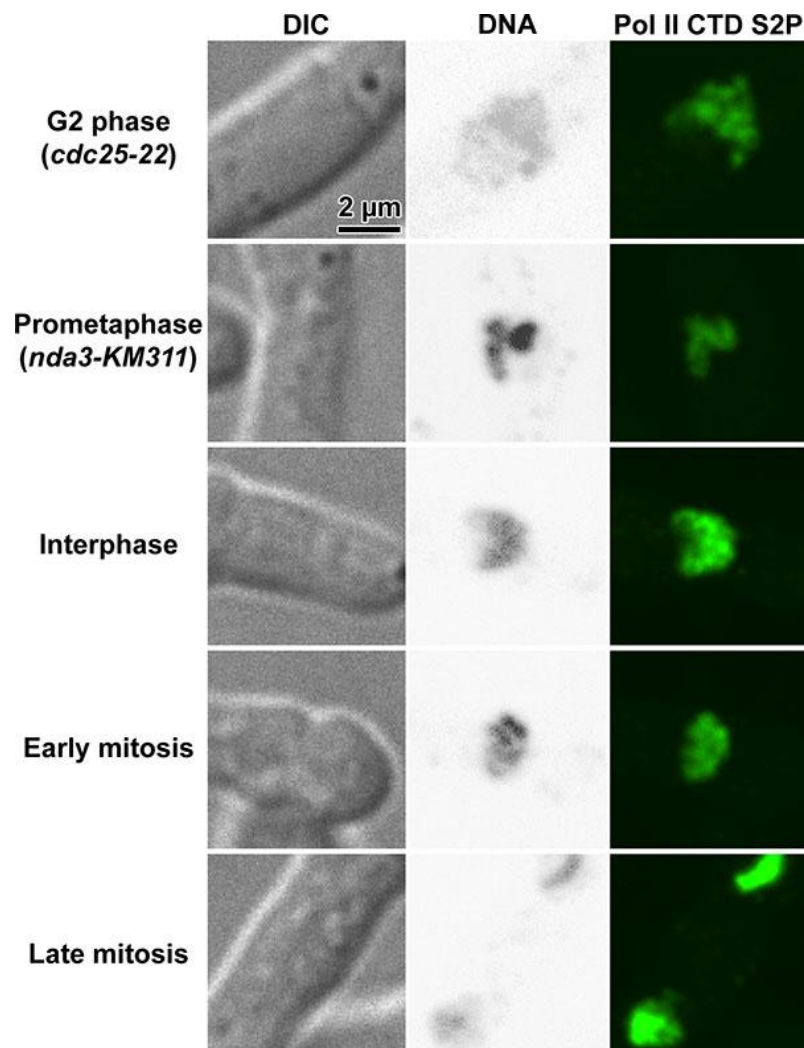

844

845 **Figure S6. Transcription is not completely repressed during mitosis.**

846 DIC and fluorescence images of G2-phase, prometaphase and unsynchronized wild

847 type cells. Left: DIC; Middle: DAPI-stained DNA with inverted contrast; Right:

848 immunofluorescence of RNA polymerase II C-terminal domain repeat, phosphorylated

849 at Serine 2 (Pol II CTD S2P). Top to bottom: *cdc25-22* cell arrested in G2 phase, *nda3-*

850 *KM311* cell arrested in prometaphase, unsynchronized cell in interphase,

851 unsynchronized cell in early mitosis, unsynchronized cell in late mitosis. In the

852 unsynchronized cultures, the cell-cycle states were determined based on the

853 chromosome morphology.

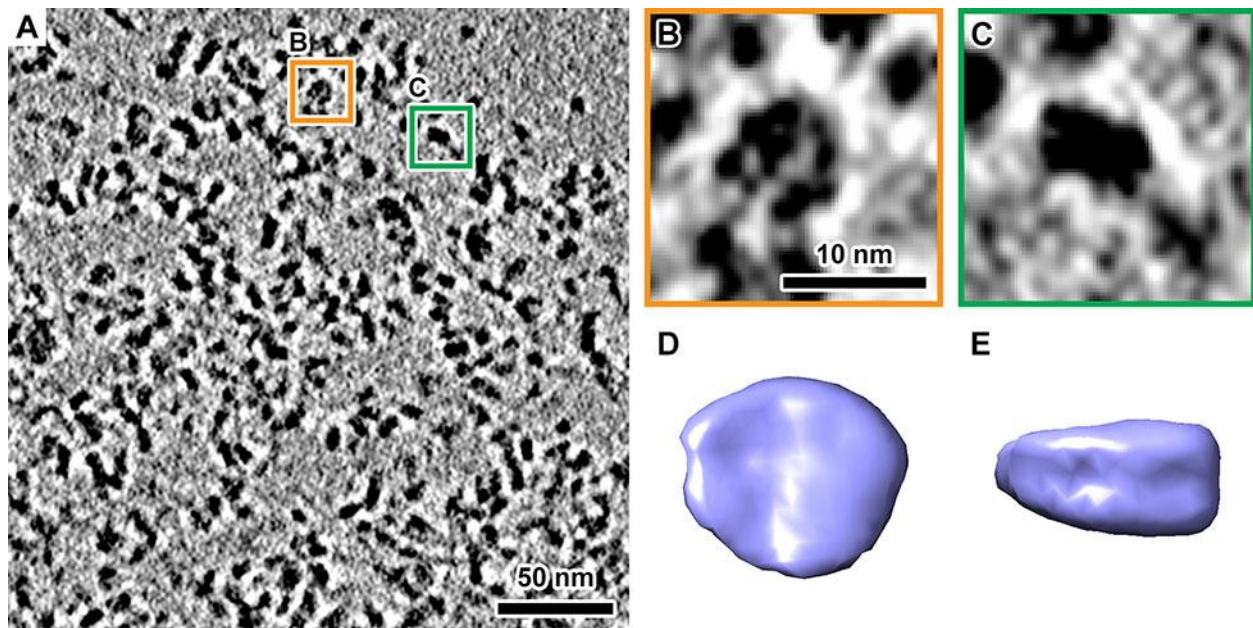

854

855 **Figure S7. Nucleosomes remain clustered in cell lysates.**

856 (A) Cryotomographic slice (11 nm) showing the chromatin released from  
857 unsynchronised *S. pombe* cells. Nucleosomes oriented face-on (orange box) and side-  
858 on (green box) are enlarged 5-fold in panels B and C, respectively. (D and E): Face-  
859 and side-on views of a nucleosome subtomogram average of particles template-  
860 matched from the cryotomogram shown in panel A. Notice that DNA gyres are visible in  
861 the side view.

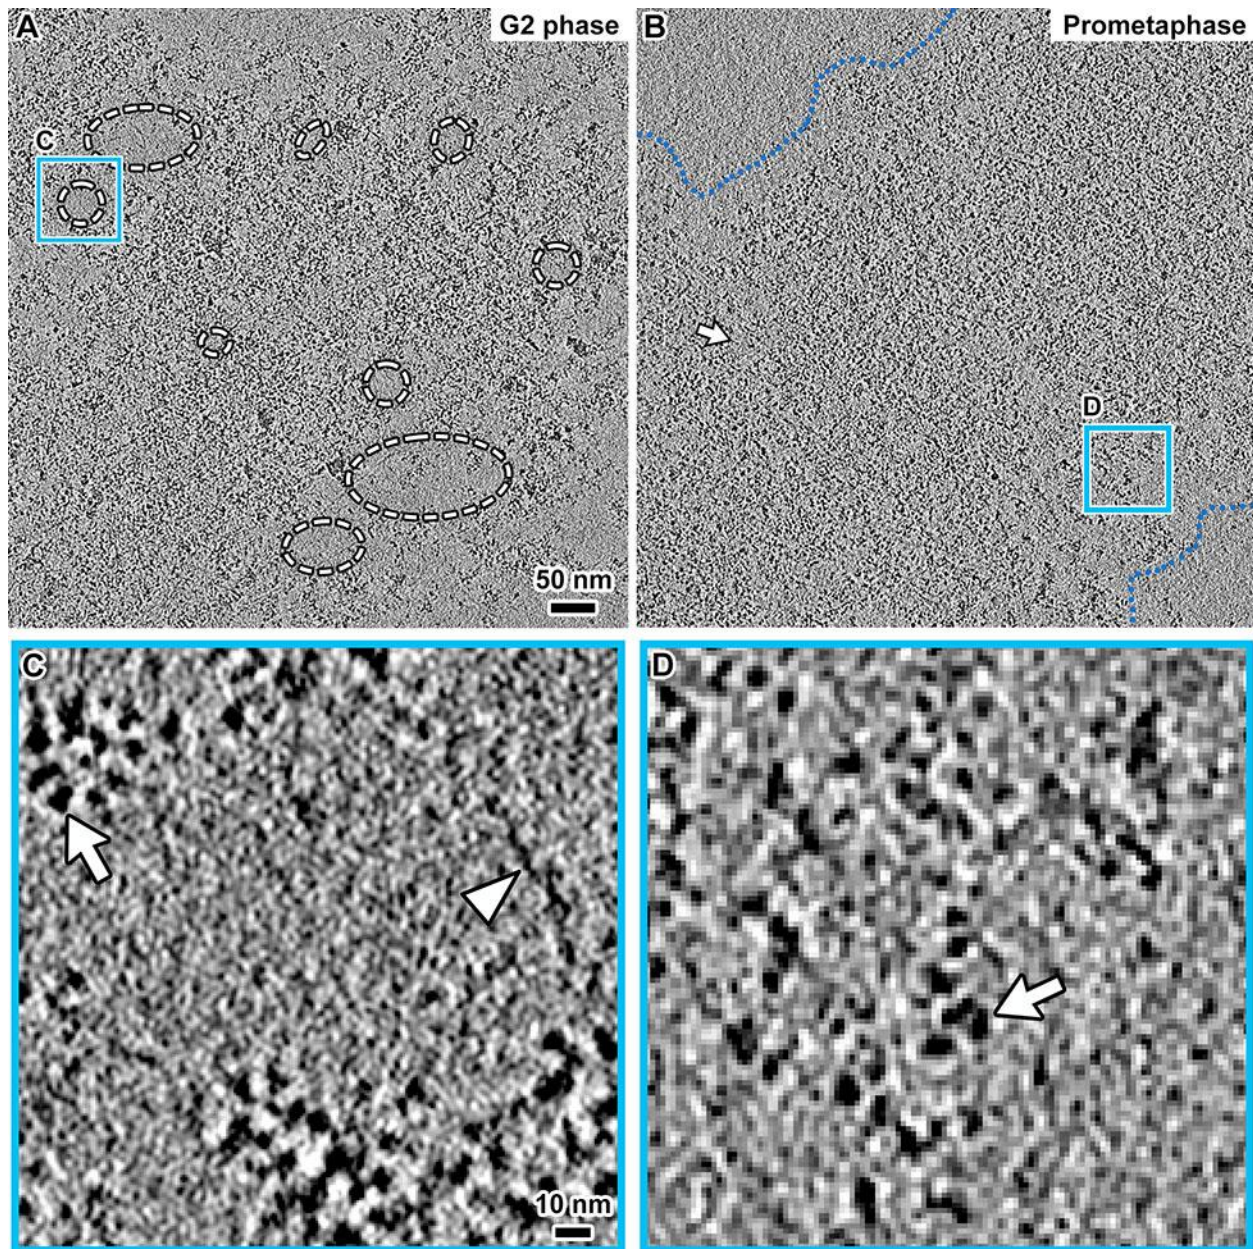

862

863 **Figure S8. *S. pombe* prometaphase chromatin is also more compact than G2-**  
864 **phase chromatin *in vitro*.**

865 (A and B) Cryotomographic slices (30 nm) of chromatin from G2 phase (A) and  
866 prometaphase (B) cell lysates. Dashed circles in panel A: examples of large  
867 nucleosome-free gaps. Blue dotted lines in panel B: boundaries of chromatin mass.

868 Arrow in panel B: examples of small nucleosome-free gap. (C and D) Four-fold

869 enlargement of blue boxes in panels A and B, respectively. Arrows: nucleosomes.

870 Arrowhead: DNA.



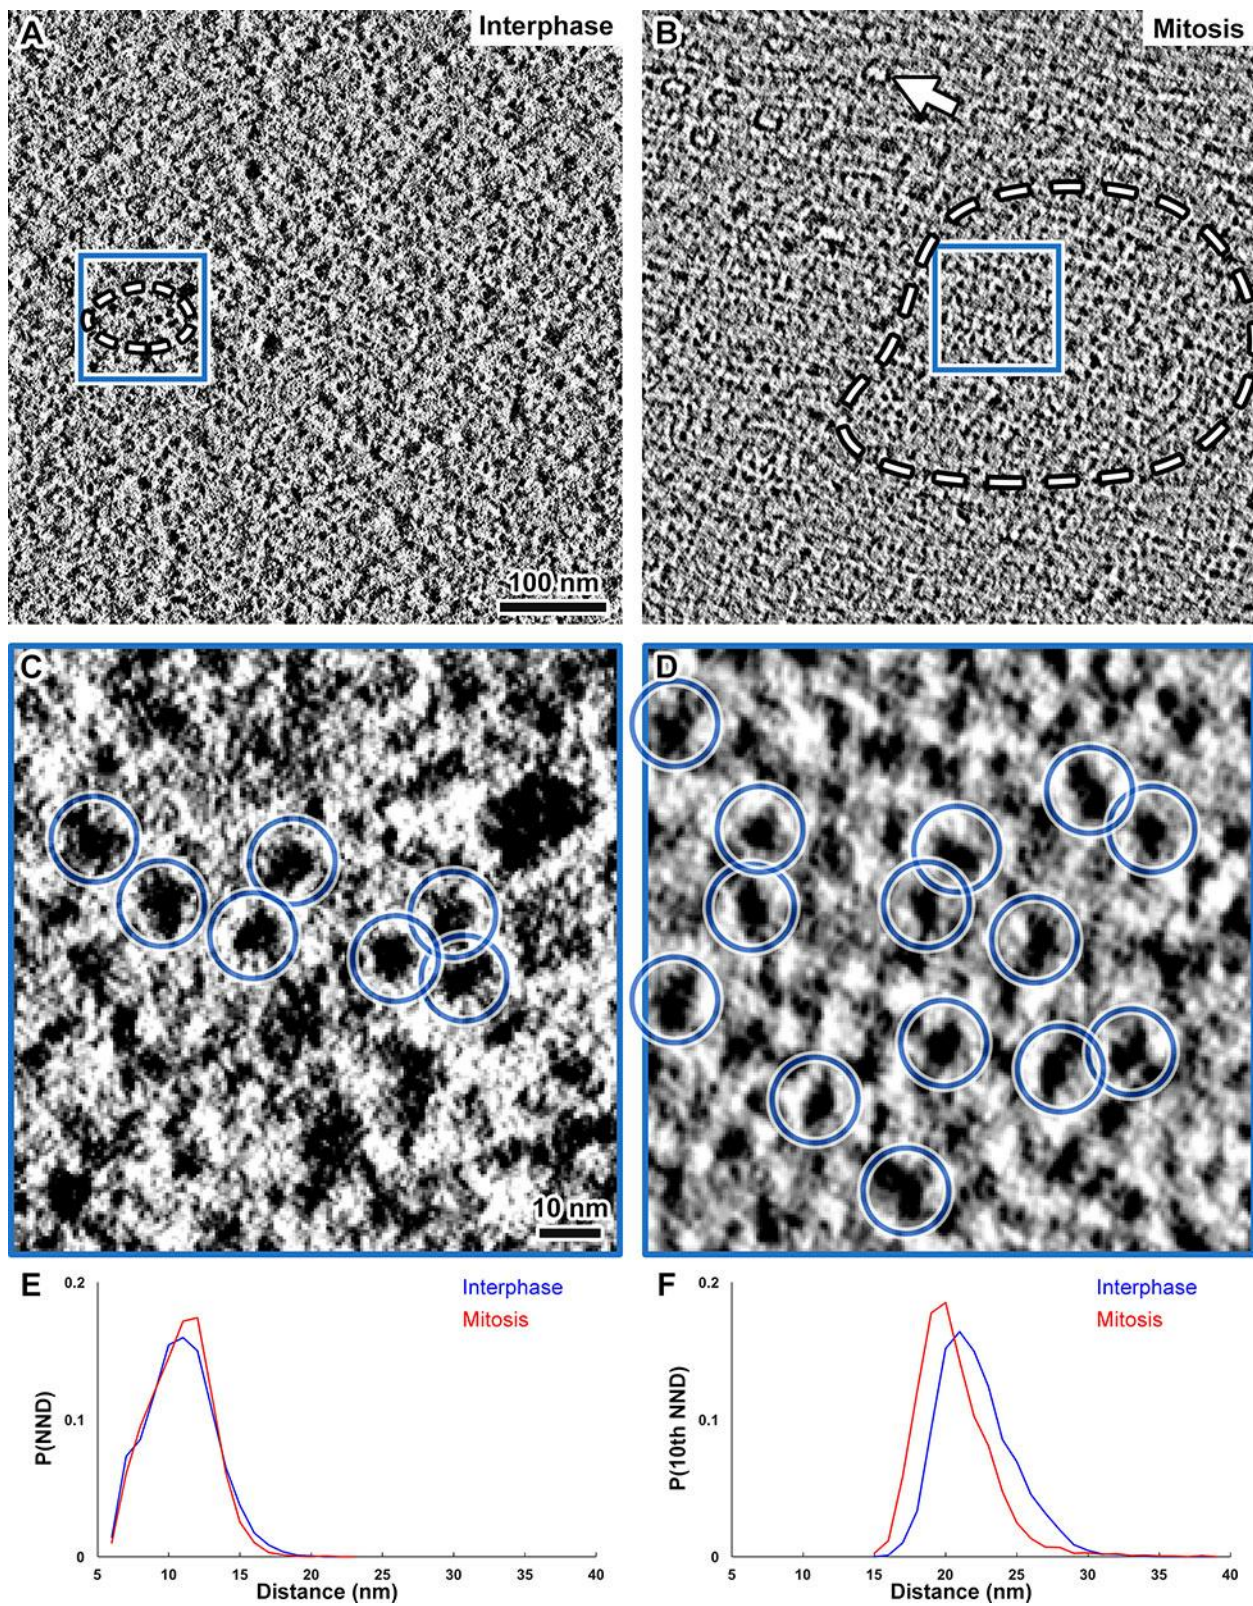

871

872 **Figure S9. *S. japonicus* nucleosomes also pack into larger clusters in mitosis.**

873 (A and B) Volta cryotomographic slices (11 nm) of *S. japonicus* intranuclear positions in  
874 an interphase (A) and a mitotic (B) cell. Dashed circles: nucleosome clusters. Arrow in  
875 panel B: a spindle microtubule. (C and D) Five-fold enlargements of nuclear positions  
876 that have nucleosomes in panels A and B. Nucleosomes are circled in blue. (E)  
877 Nearest-neighbor and (F) tenth nearest-neighbor distance analyses of nucleosome  
878 template-matching hits.

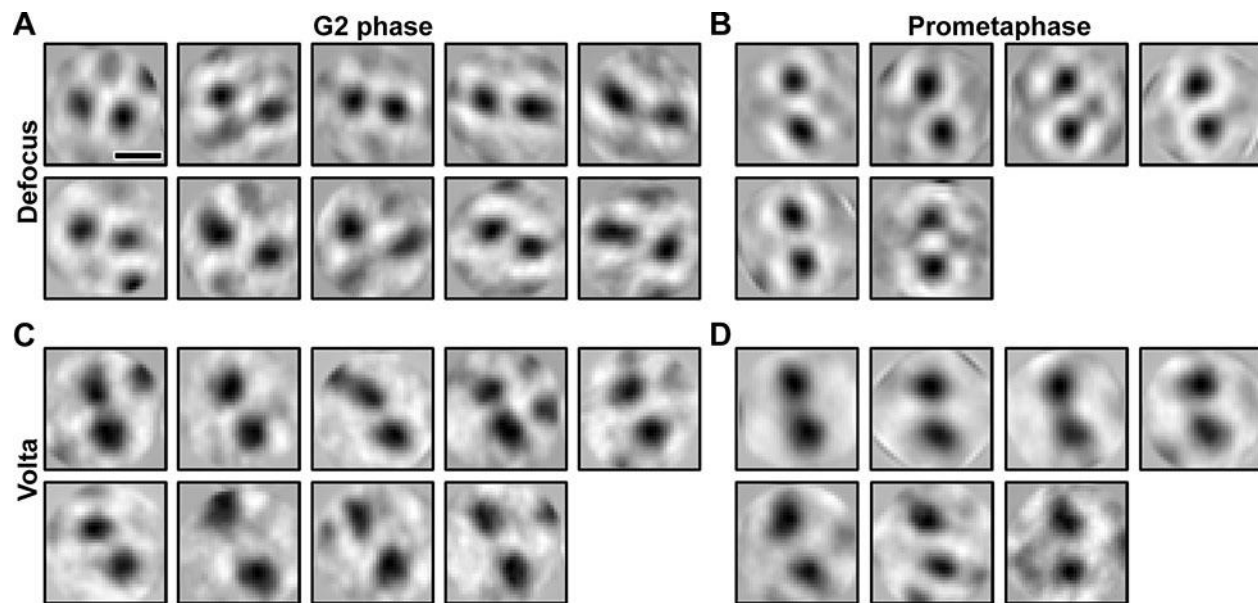

879

880 **Figure S10. *S. pombe* nucleosomes do not stack face-to-face in either G2-phase**  
881 **or mitotic chromosomes.**

882 (A and C) Two-dimensional classification of dinucleosome template-matching hits in  
883 defocus (A) and Volta (C) cryotomograms of G2-phase cells. (B and D) Two-  
884 dimensional classification of dinucleosome template-matching hits in defocus (B) and  
885 Volta (D) cryotomograms of prometaphase cells. Note that the 2-D classes showing  
886 megacomplexes (false positives) or tri-nucleosomes are not shown. Also note that some  
887 class averages, e.g., upper-left one in panel A, have a weak third density. This  
888 additional density may be from a lower-occupancy nucleosome position or a  
889 nucleosome that was truncated by the tomographic slice because it was not in the same  
890 exact plane as the other two. Scale bar in panel A: 10 nm.

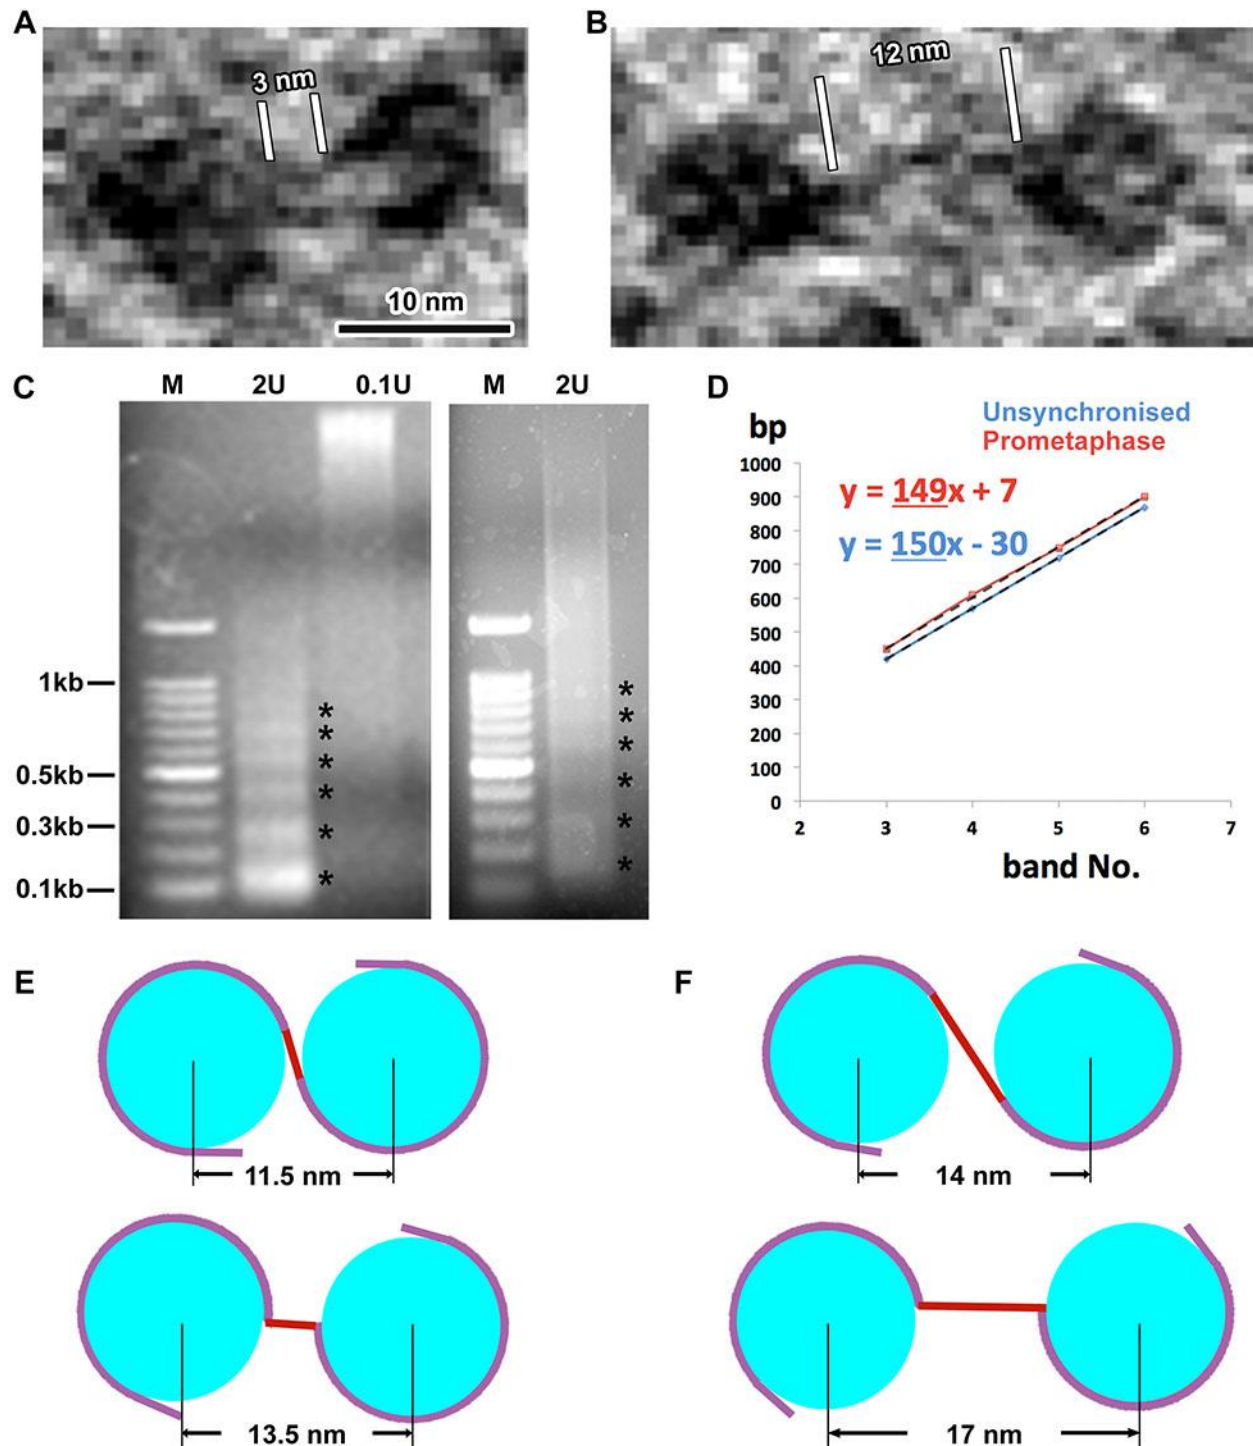

891

892 **Figure S11. A subset of nucleosomes might be partially unwrapped *in vivo*.**

893 (A and B) Volta cryotomographic slices (10 nm) of a di-nucleosome-like density in a *S.*

894 *pombe* G2-phase cell, showing densities consistent with short (A) and long (B) linker

895 DNA. (C) The chromatin in unsynchronised (left; most cells are in G2-phase) and  
896 prometaphase (right) cells were fixed and then digested with 2 units or 0.1 units of  
897 MNase. DNA bands corresponding to mono- and oligonucleosomes are indicated by  
898 asterisks. (D) Nucleosome-repeat length plot of oligomer band number vs. base pairs.  
899 The monomer and dimer were excluded from the linear regression because the  
900 'nibbling' of linker DNA at the ends would cause an overestimate of the slope and  
901 therefore, the nucleosome repeat length. (E and F) Cartoons showing fully (E) and  
902 partially (F) wrapped di-nucleosomes, drawn to scale for the nucleosome diameter and  
903 DNA length (but not DNA thickness). Red: *S. pombe* linker DNA. For the fully wrapped  
904 nucleosomes, the linker DNA is 2.5 nm (7 bp) long. For the partially wrapped example  
905 (10 bp unwrapped from the end of each nucleosome, the linker DNA becomes 6 nm  
906 long). The upper and lower panels show the extreme examples that minimize (upper) or  
907 maximize (lower) the inter-nucleosome separation for a given linker length. Upper  
908 panels: straight linker DNA. Lower panels: linker DNA bent at an energetically  
909 unfavorable ring angles at the entry/exit site.

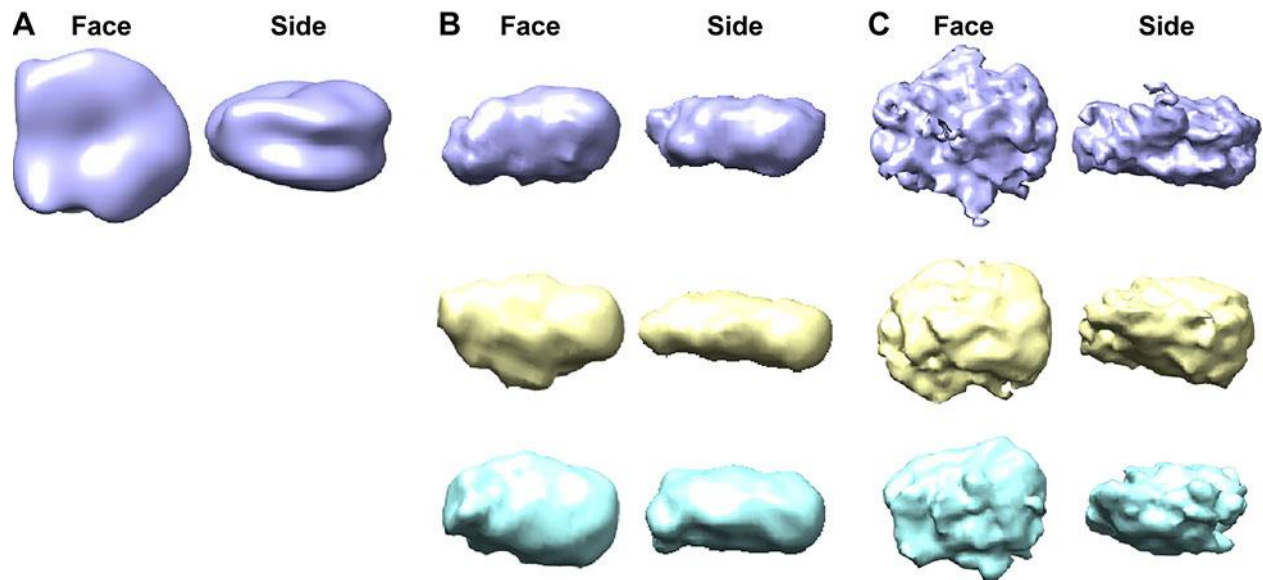

910

911 **Figure S12. 3-D class averages of nucleosome-like densities do not reveal high-**  
912 **resolution mononucleosome-like features.**

913 (A) A simulated density map of a mononucleosome crystal structure (PDB 1ID3; (White  
914 et al., 2001)), low-pass filtered to 40 Å resolution. (B and C) Isosurface  
915 renderings of representative 3-D class averages of template-matching hits in the nuclei  
916 of a defocus (B) and a Volta (C) cryotomogram.

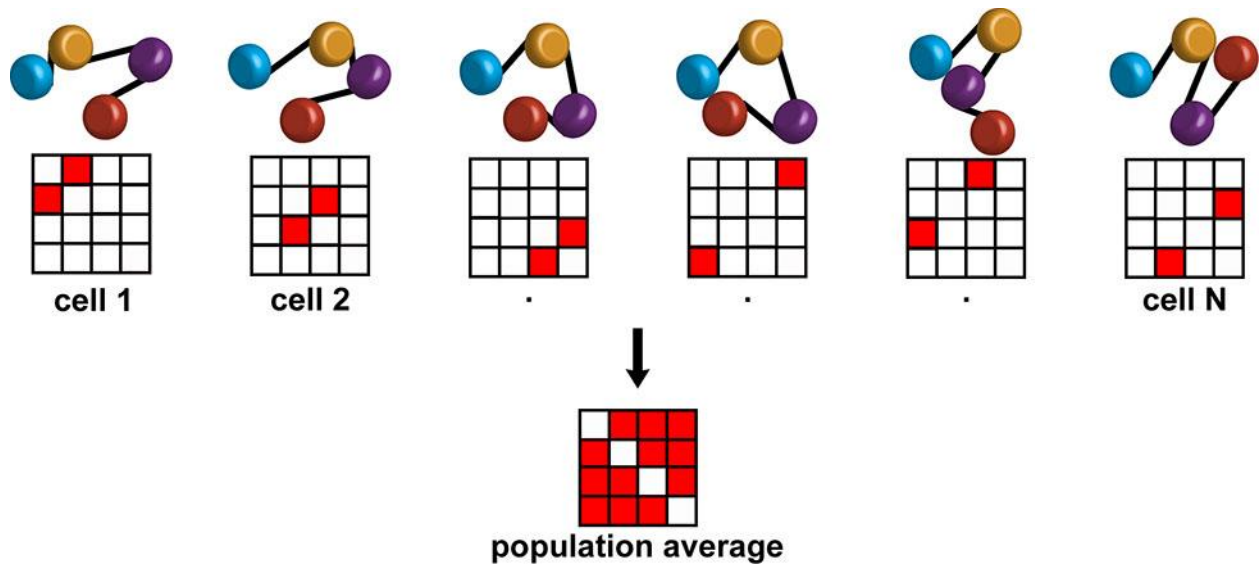

917

918 **Figure S13. Reconciliation of *S. pombe* cryo-ET and Hi-C chromatin models.**

919 The blue, orange, purple and red rounded cylinders represent four sequential  
920 nucleosomes. Black lines indicate the connectivity between nucleosomes. Each column  
921 represents the nucleosomal arrangement of a different cell, at the time of fixation. The  
922 nucleosome pairs that are in physical contact have the potential to form crosslinks that  
923 can result in their detection, which is plotted in the contact matrices in the second row.  
924 Cell-to-cell variation at the time of fixation can result in the populational average shown  
925 in the Hi-C-based contact map (lower half). For clarity, only four nucleosomes are  
926 illustrated, but the concept here scales to clusters containing many more nucleosomes.

927 **Table S1. Cryo-EM and image-analysis specifics.**

|                                        |                                                    |
|----------------------------------------|----------------------------------------------------|
| EM grid                                | C-flat 4-2-2, EMS continuous carbon                |
| Microscope                             | FEI Titan Krios                                    |
| Energy                                 | 300 keV                                            |
| Gun type                               | FEG                                                |
| Camera                                 | Falcon II Direct Detector                          |
| Tomography software                    | Leginon & FEI Tomo                                 |
| Nominal magnification                  | 8,700, 11000, 18000                                |
| Calibrated pixel size                  | 9 Å, 7.3 Å, 4.6 Å                                  |
| Defocus (nominal)                      | -8-12 µm                                           |
| Defocus (fitted)                       | -9-13 µm                                           |
| Defocus (nominal, Volta contrast)      | -0.5 µm                                            |
| Cumulative dose                        | 80 - 150 e <sup>-</sup> / Å <sup>2</sup>           |
| Dose fractionation                     | 1 / cosine                                         |
| Tilt range                             | ±60°                                               |
| Tilt increment                         | 1° or 2°                                           |
| Tomogram processing & visualization    | IMOD 4.9                                           |
| Template matching                      | PEET 1.10 - 1.11                                   |
| File format conversion                 | Bsoft 1.8.8                                        |
| Subtomogram classification & averaging | RELION 1.4, 2.0                                    |
| Density map visualization              | UCSF Chimera 1.11                                  |
| Figure creation and compositing        | Adobe Photoshop and Illustrator CS6, Google sheets |

928



929 **Table S2.** Cryotomogram details

| Tomogram ID | Cells        | Cell-cycle state, sample type | Figure       | Dose | Pixel size (Å) | Defocus † (µm) |       | DPC/VPC |
|-------------|--------------|-------------------------------|--------------|------|----------------|----------------|-------|---------|
|             |              |                               |              |      |                | nom            | ref   |         |
| 15Jun11_03  | <i>pombe</i> | G2, cell                      | 1B, C, S2    | 103  | 7.3            | 12             | 13-17 | DPC     |
| 17May10_01  | <i>pombe</i> | G2, cell                      | 2, S5A, S10A | 80   | 7.3            | 12             | 13    | DPC     |
| 17May09_18  | <i>pombe</i> | PM, cell                      | 3            | 80   | 7.3            | 12             | 12    | DPC     |
| 15Nov16_10  | <i>pombe</i> | PM, cell                      | 4, 5B, D     | 100  | 4.6            | 0.5            |       | VPC     |
| 16Mar19_123 | <i>pombe</i> | G2, cell                      | 5A, C, S12   | 100  | 4.6            | 0.5            |       | VPC     |
| 16Dec21_20  | <i>pombe</i> | PM, cell                      | S3B          | 150  | 7.3            | 12             | 13    | DPC     |
| 16Dec21_18  | <i>pombe</i> | PM, cell                      | S3C          | 150  | 7.3            | 12             | 13    | DPC     |
| 16Dec21_13  | <i>pombe</i> | PM, cell                      | S3D          | 150  | 7.3            | 12             | 13    | DPC     |
| 16Dec21_12  | <i>pombe</i> | PM, cell                      | S3E          | 150  | 7.3            | 12             | 13    | DPC     |
| 16Dec21_06  | <i>pombe</i> | PM, cell                      | S3F          | 150  | 7.3            | 12             | 13    | DPC     |
| 15Jun11_07  | <i>pombe</i> | G2, cell                      | S4A, C, D    | 103  | 7.3            | 12             | 13-17 | DPC     |
| 15May25_02  | <i>pombe</i> | PM, cell                      | S4B, E, F    | 100  | 7.3            | 12             | 10-17 | DPC     |
| 17May09_13  | <i>pombe</i> | PM, cell                      | S5B, S10B    | 80   | 7.3            | 12             | 13    | DPC     |
| 17May10_02  | <i>pombe</i> | G2, cell                      | S5C, S10C    | 80   | 7.3            | 0.5            |       | VPC     |

|            |              |                            |         |     |     |     |    |     |
|------------|--------------|----------------------------|---------|-----|-----|-----|----|-----|
| 16Dec06_10 | <i>pombe</i> | PM, cell                   | S5D     | 150 | 7.3 | 0.5 |    | VPC |
| 16Nov14_05 | <i>pombe</i> | Unsynchronis<br>ed, lysate | S7      | 150 | 7.3 | 12  | 12 | DPC |
| 17Jul08_04 | <i>pombe</i> | G2, lysate                 | S8A, C  | 108 | 7.3 | 12  | 14 | DPC |
| 17Jul08_01 | <i>pombe</i> | PM, lysate                 | S8B, D  | 100 | 7.3 | 12  | 14 | DPC |
| 16Aug12_03 | <i>japo</i>  | Interphase,<br>cell        | S9A, C  | 100 | 5.8 | 0.5 |    | VPC |
| 16Jul25_14 | <i>japo</i>  | Mitosis, cell              | S9B, D  | 100 | 7.3 | 0.5 |    | VPC |
| 16Dec06_7  | <i>pombe</i> | PM, cell                   | S10D    | 150 | 7.3 | 0.5 |    | VPC |
| 15Nov16_09 | <i>pombe</i> | G2, cell                   | S11A, B | 100 | 4.6 | 0.5 |    | VPC |

930 Cell type: *pombe* = *S. pombe*; *japo* = *S. Japonicus*, G2 = G2 phase, PM =

931 prometaphase, Dose, in electrons / Å<sup>2</sup>; † Nominal (nom) and refined (ref) defocus

932 values; DPC = defocus phase contrast; VPC = Volta phase contrast
